# Supplementary material
Source: PubMed Central journal article supplement (PMC9263249)
Supplement: mmc1.pdf [file mmc1.pdf]

**Supplemental Information**

**FOSL1 promotes proneural-to-mesenchymal  
transition of glioblastoma stem cells  
via UBC9/CYLD/NF- $\kappa$ B axis**

**Zhengxin Chen, Shuai Wang, Hai-Lin Li, Hui Luo, Xiaoting Wu, Jiacheng Lu, Hong-Wei Wang, Yuanyuan Chen, Dan Chen, Wen-Ting Wu, Shuyu Zhang, Qiongqiong He, Daru Lu, Ning Liu, Yongping You, Wei Wu, and Huibo Wang**



# Supplemental Figure 1

**A**

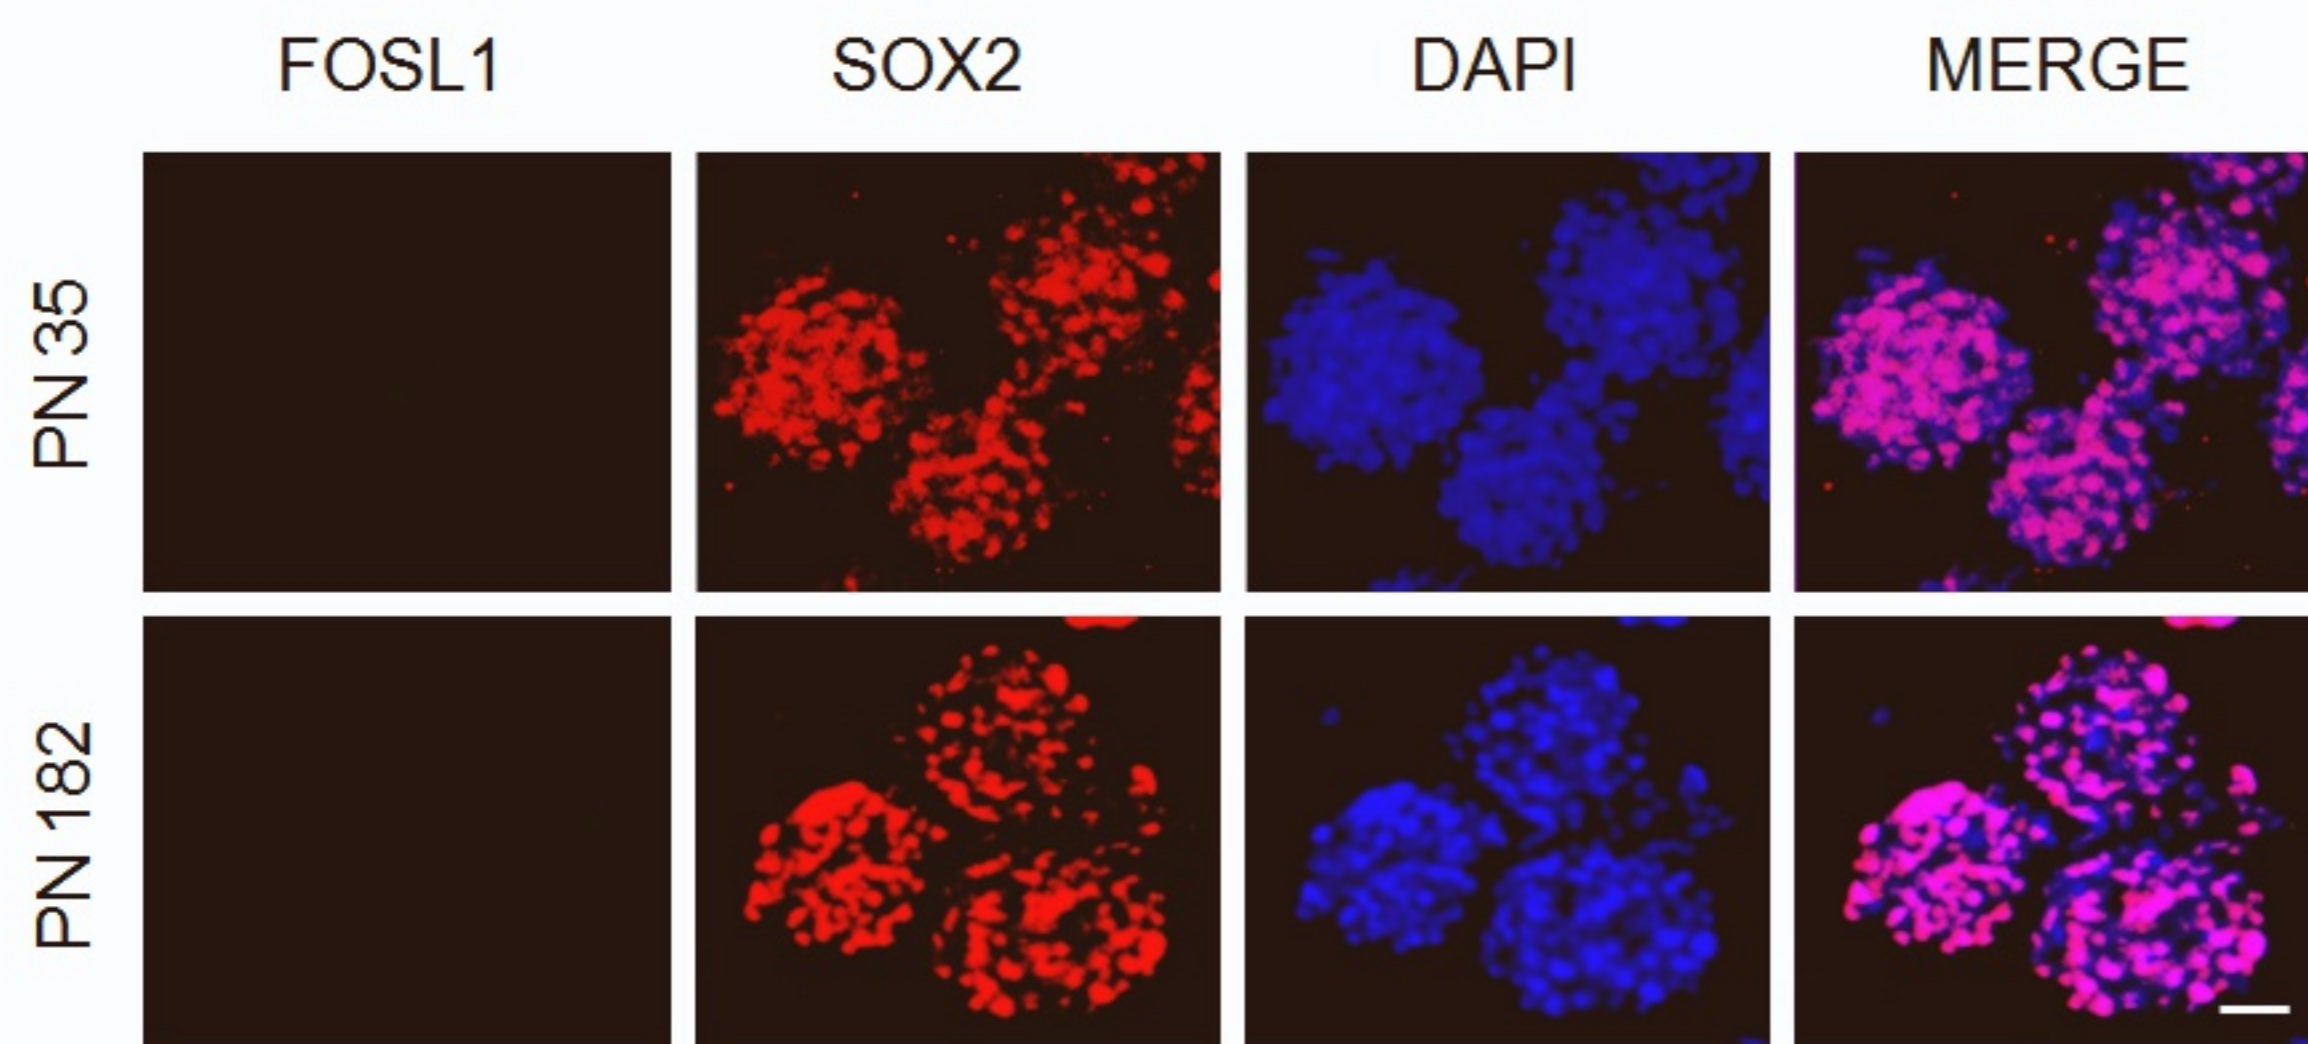

**B**

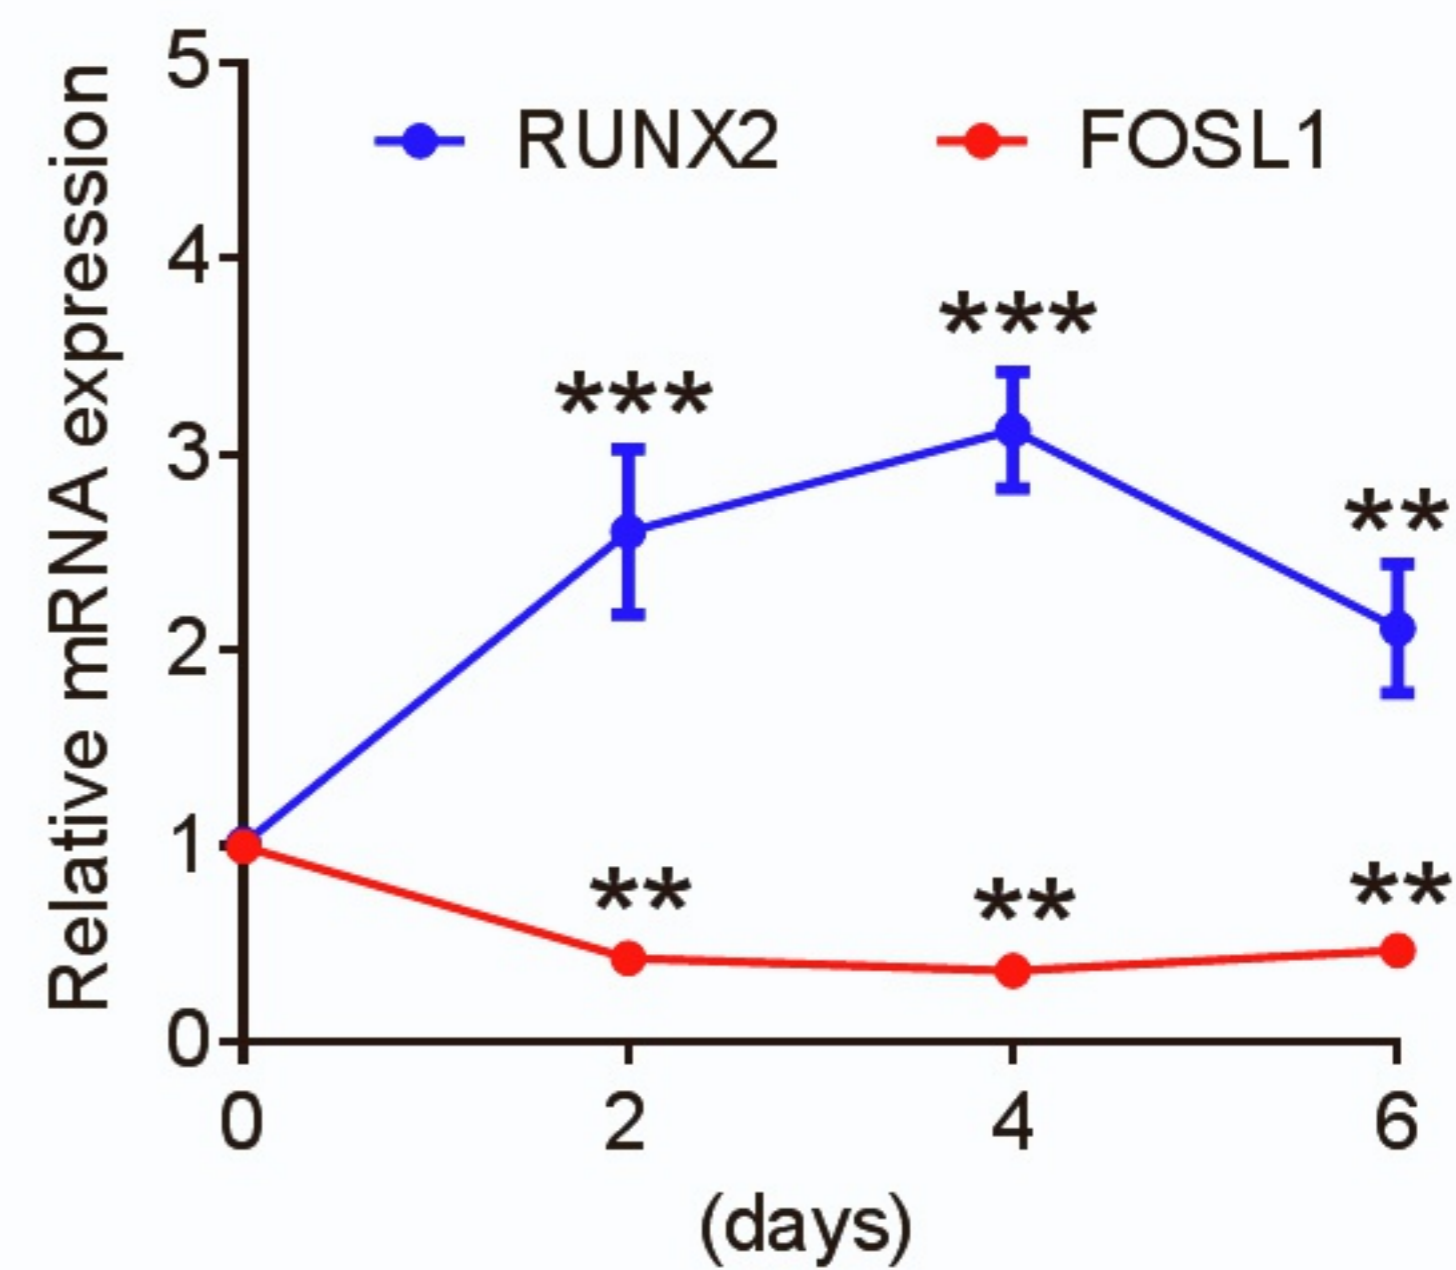

**C**

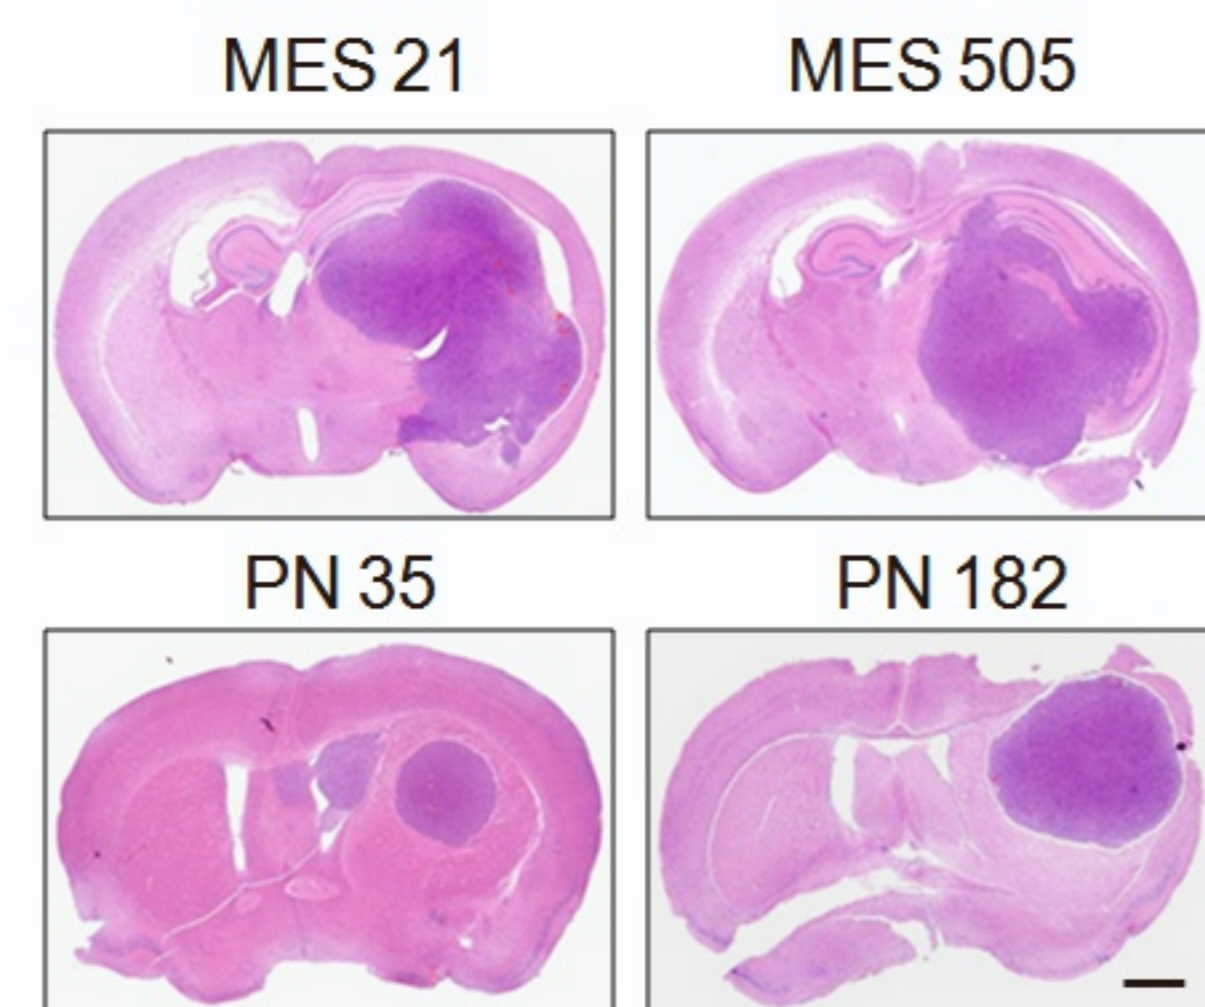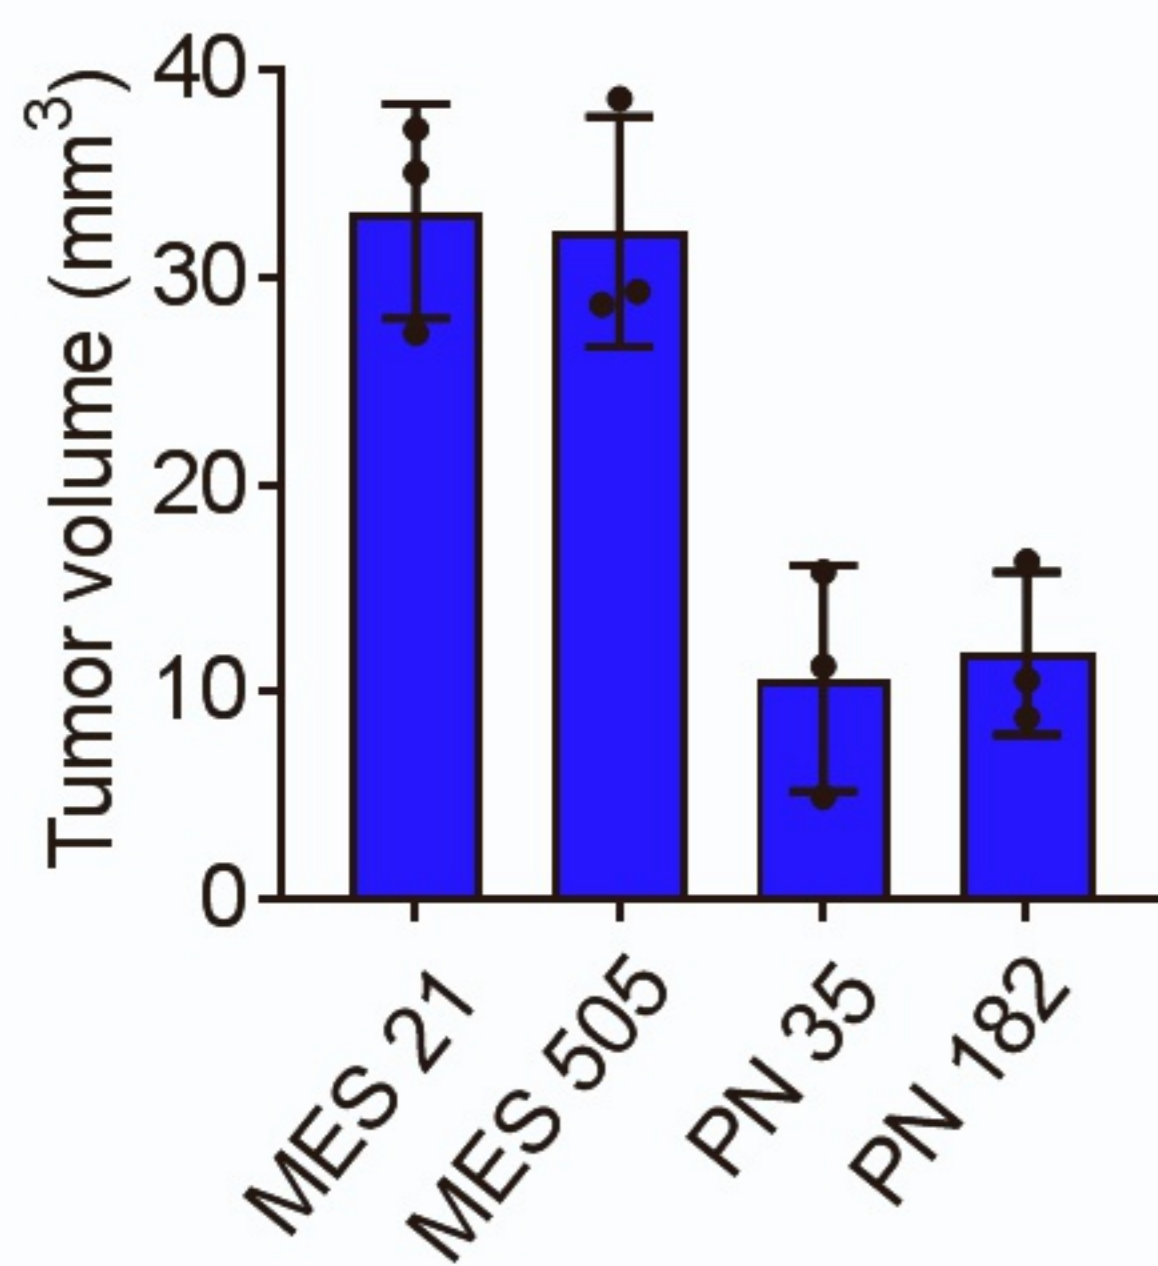

**D**

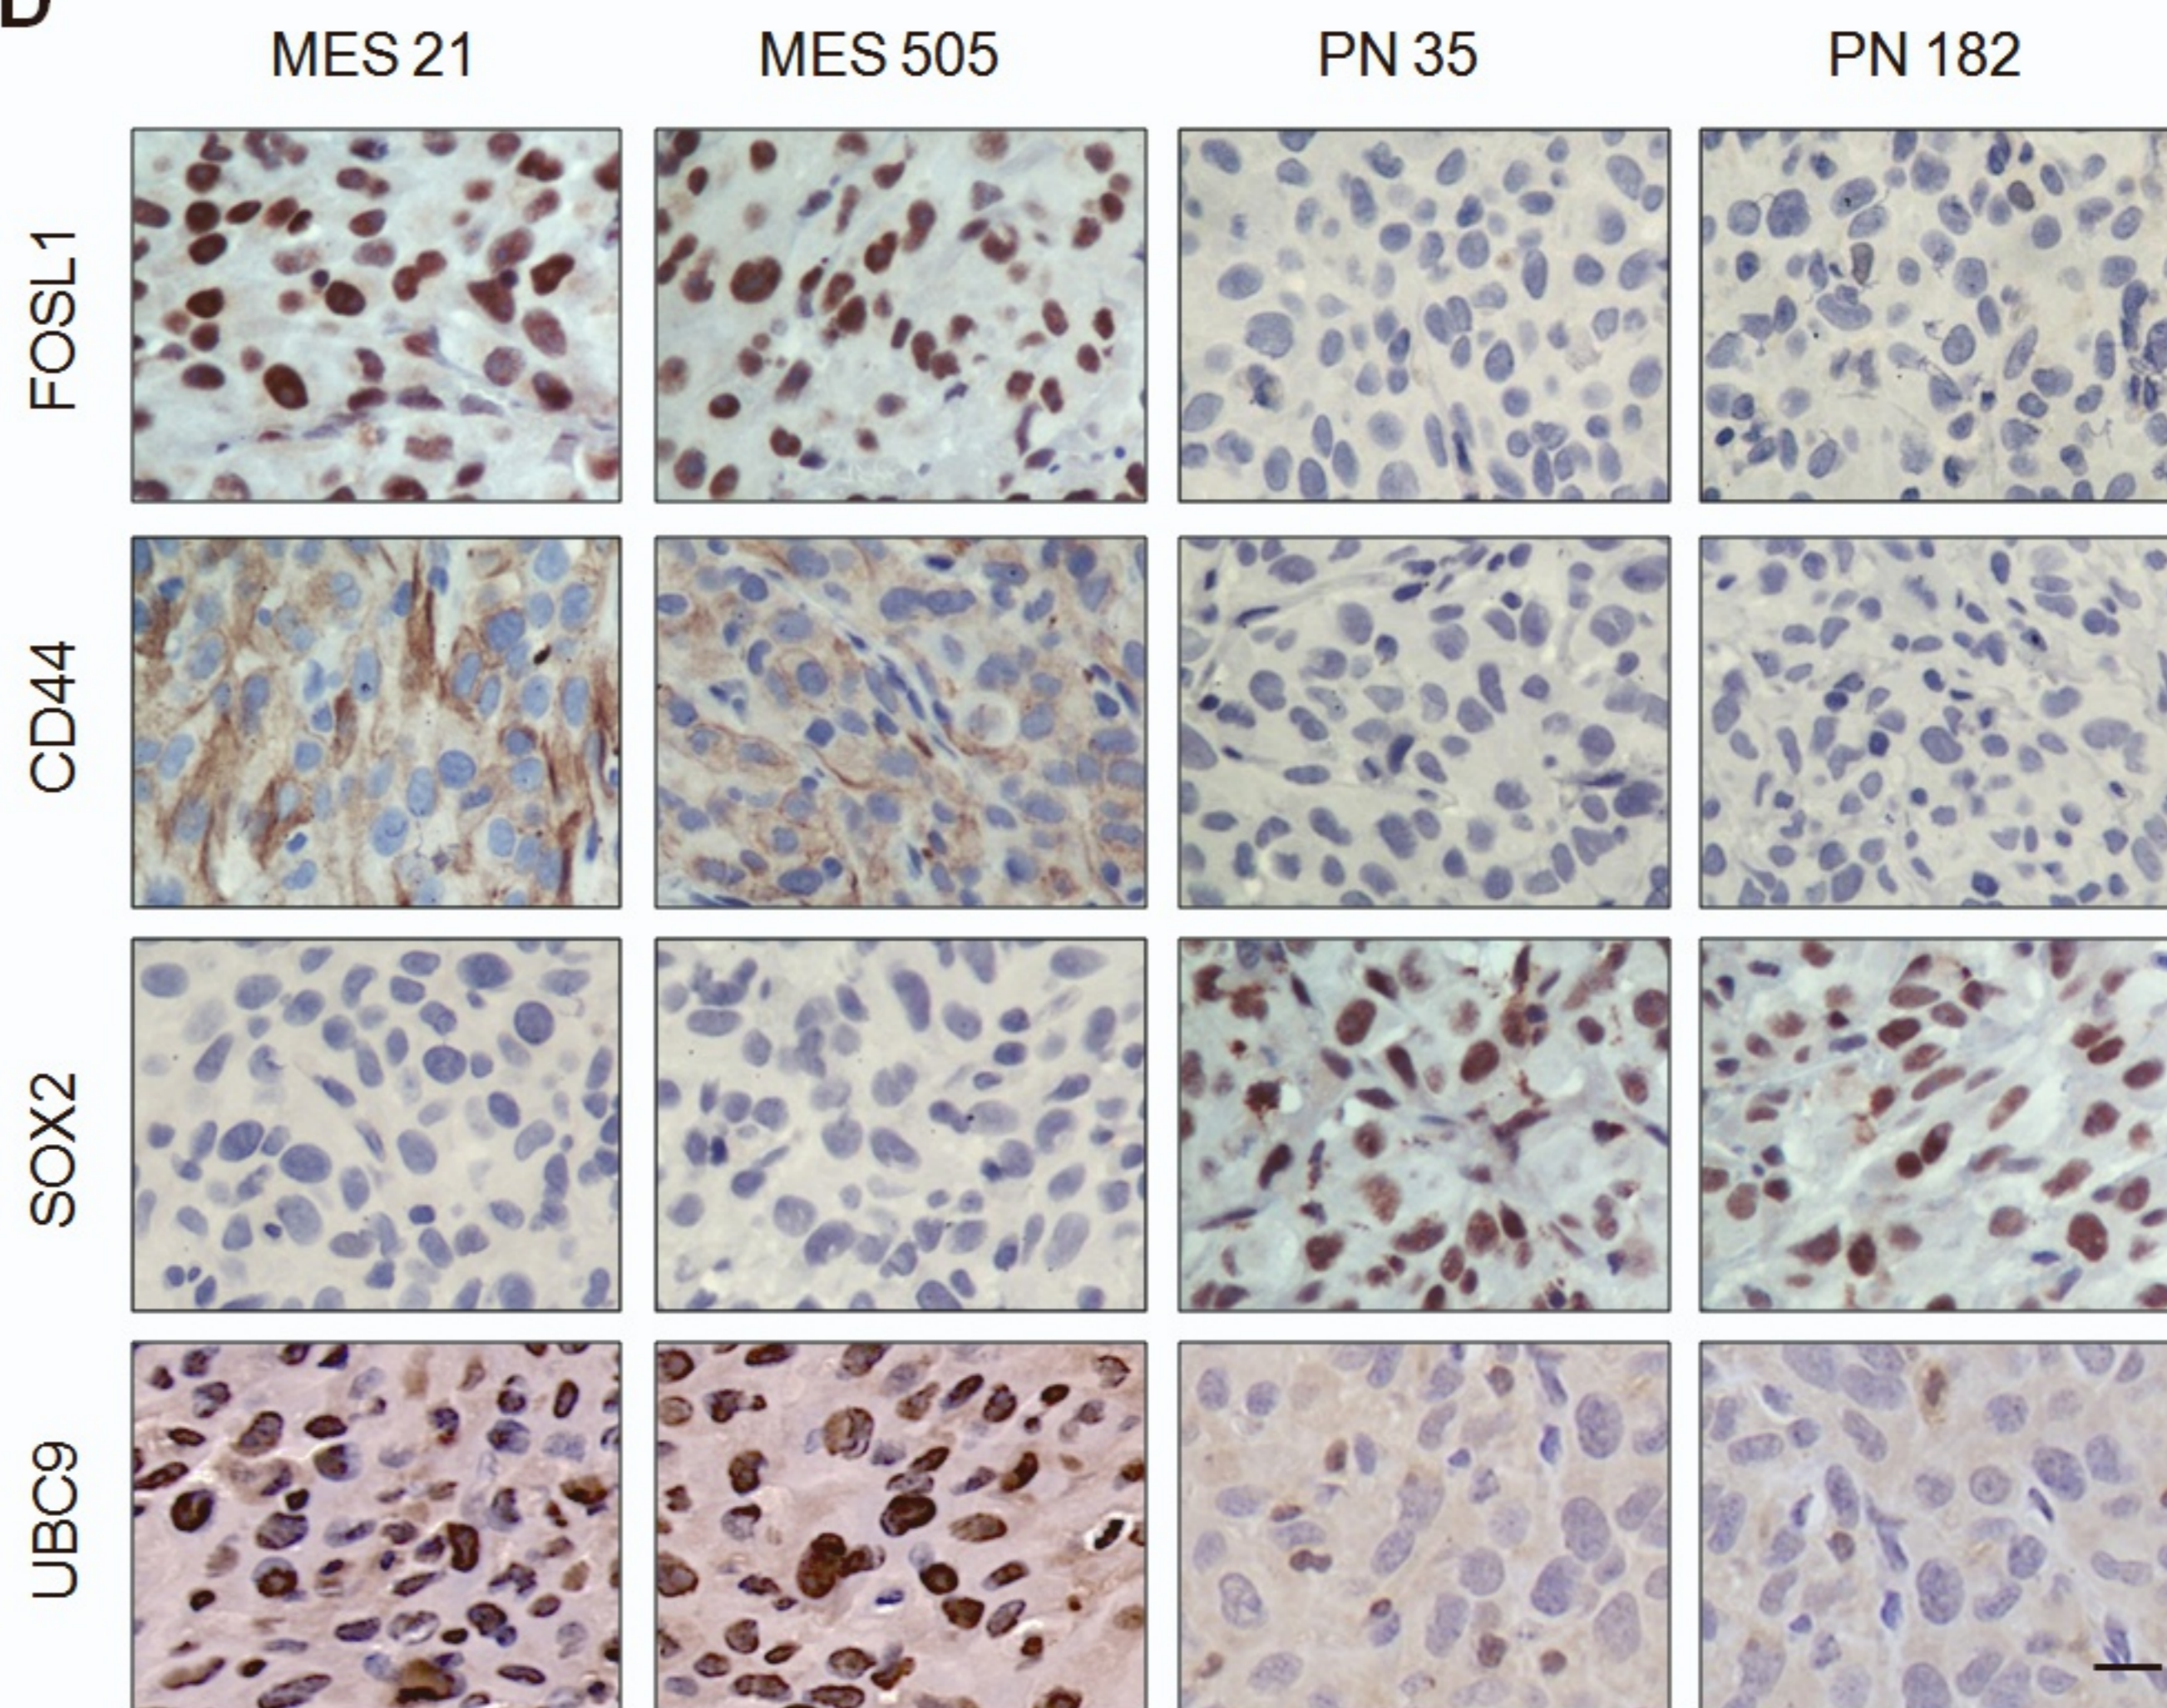



**Figure S1. FOSL1 maintains the MES phenotype in GSCs**

(A) Representative IF images of FOSL1 and SOX2 expression in PN 35 and PN 182 GSCs. FOSL1 was labeled in green and SOX2 in red. Nuclei were counterstained with DAPI (blue). Scale bar, 25  $\mu\text{m}$ . (B) qRT-PCR analysis of mRNA expression of FOSL1 and an osteogenic differentiation marker RUNX2 in MES 21 GSC during osteogenic differentiation induction. (C) Representative images of intracranial xenograft tumors derived from MES 21, MES 505, PN35 and PN 182 GSCs. The bar graph shows the mean tumor volume. (D) Representative IHC staining images of FOSL1, CD44, SOX2 and UBC9 in the orthotopic xenograft mouse model using MES 21, MES 505, PN35 and PN 182 GSCs. Scale bar, 20  $\mu\text{m}$ . Data are represented as means  $\pm$ SD of 3 independent experiments.  $**P < 0.01$ ,  $***P < 0.001$ , 2-tailed Student's t test.



## Supplemental Figure 2

**A**

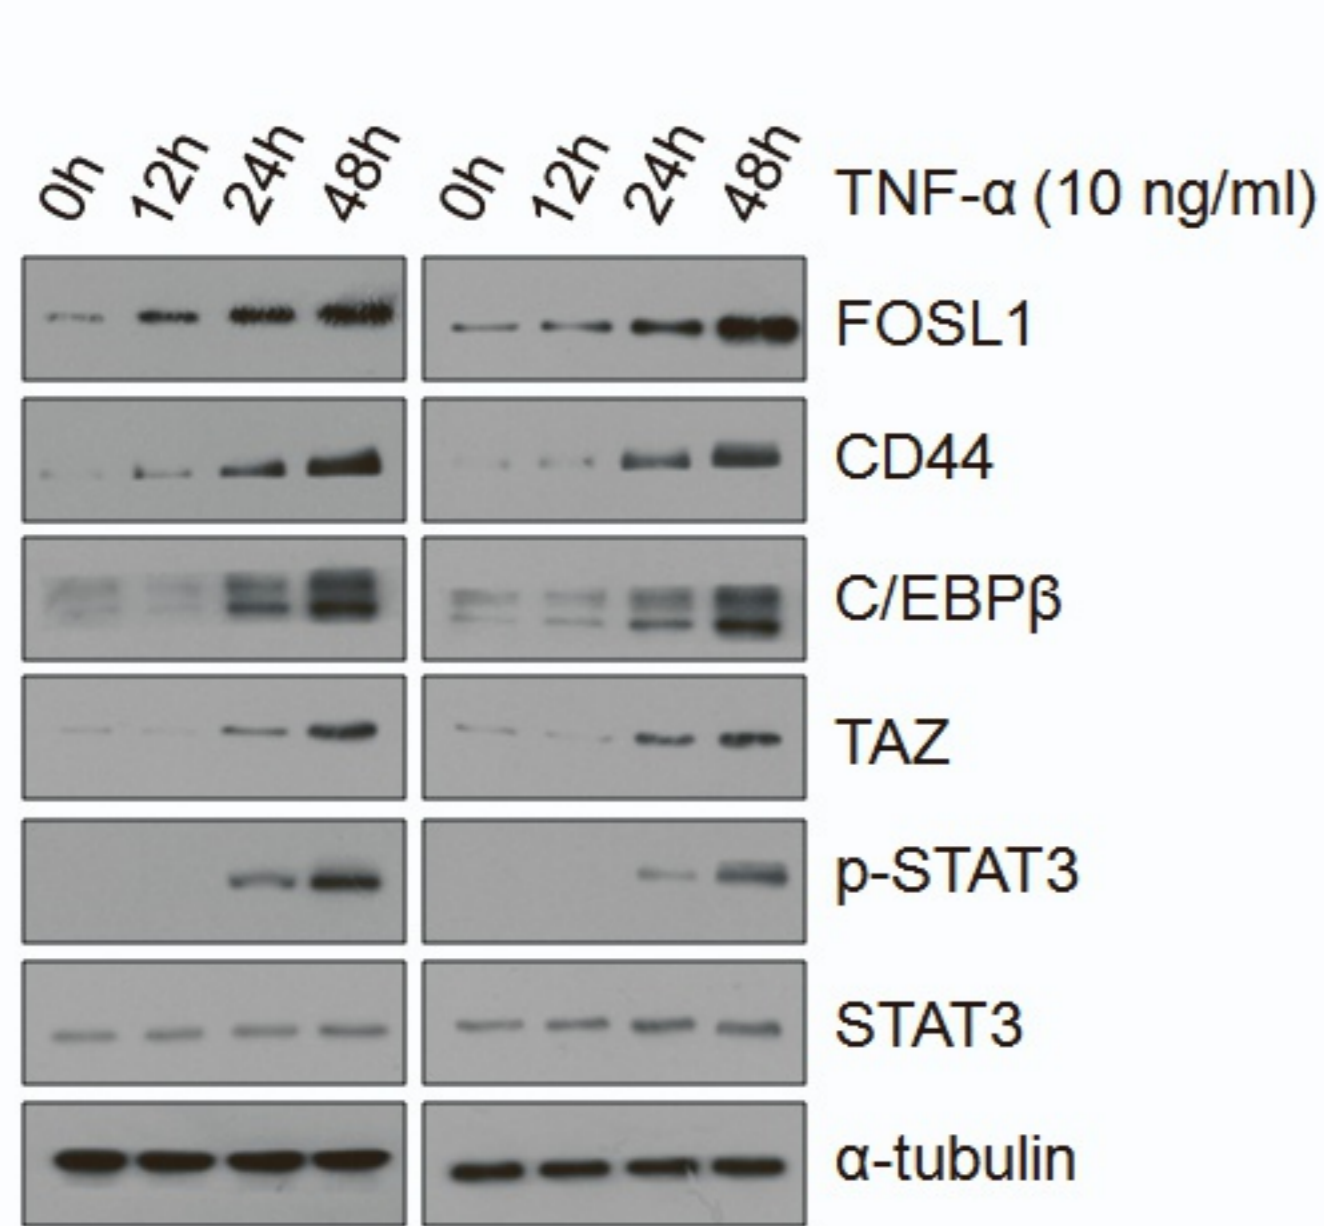

**B**

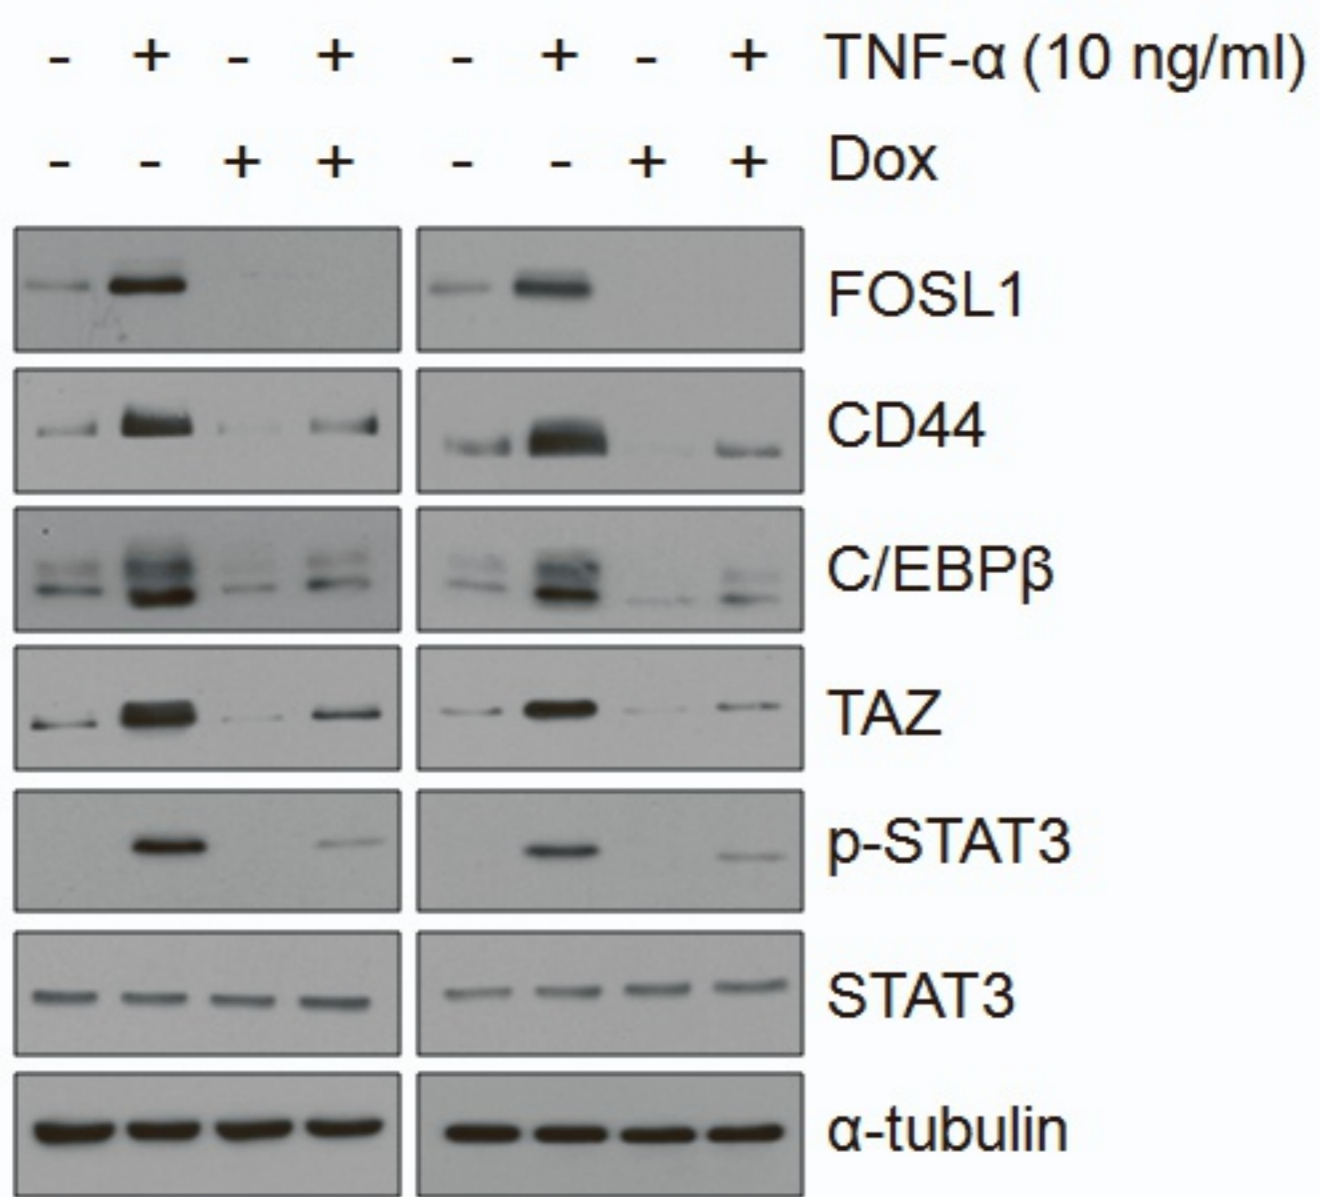

**D**

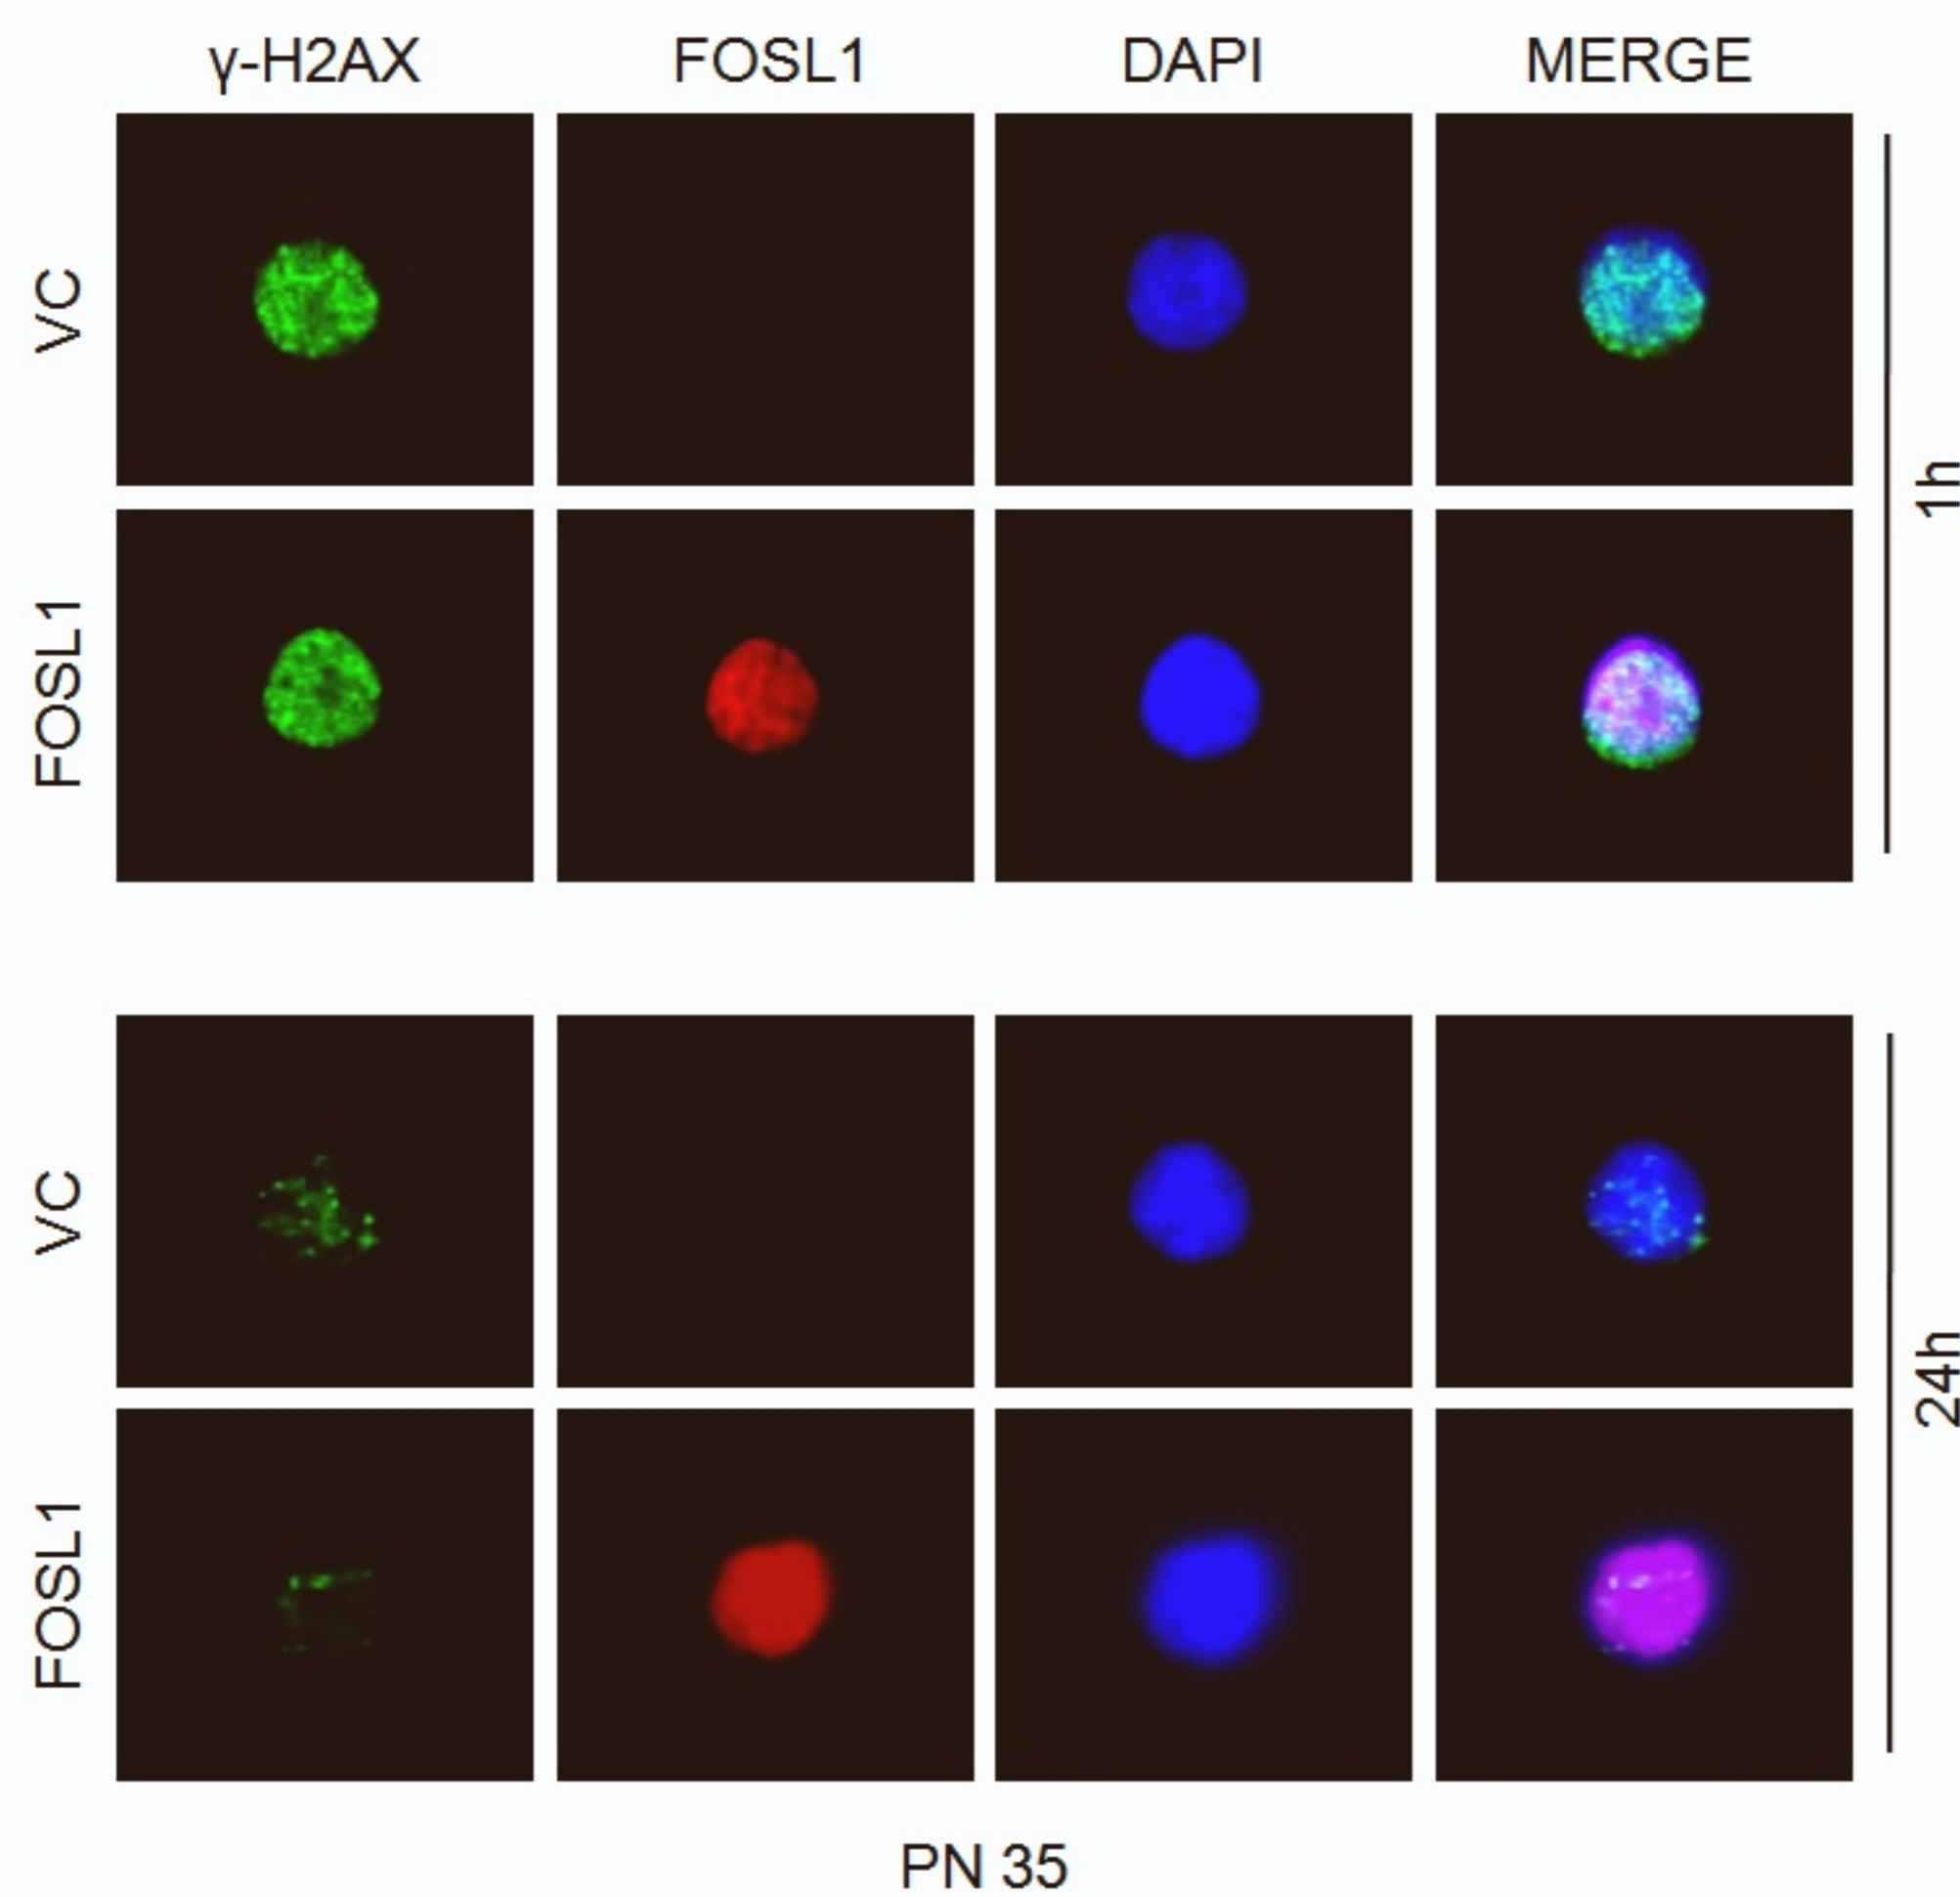

**C**

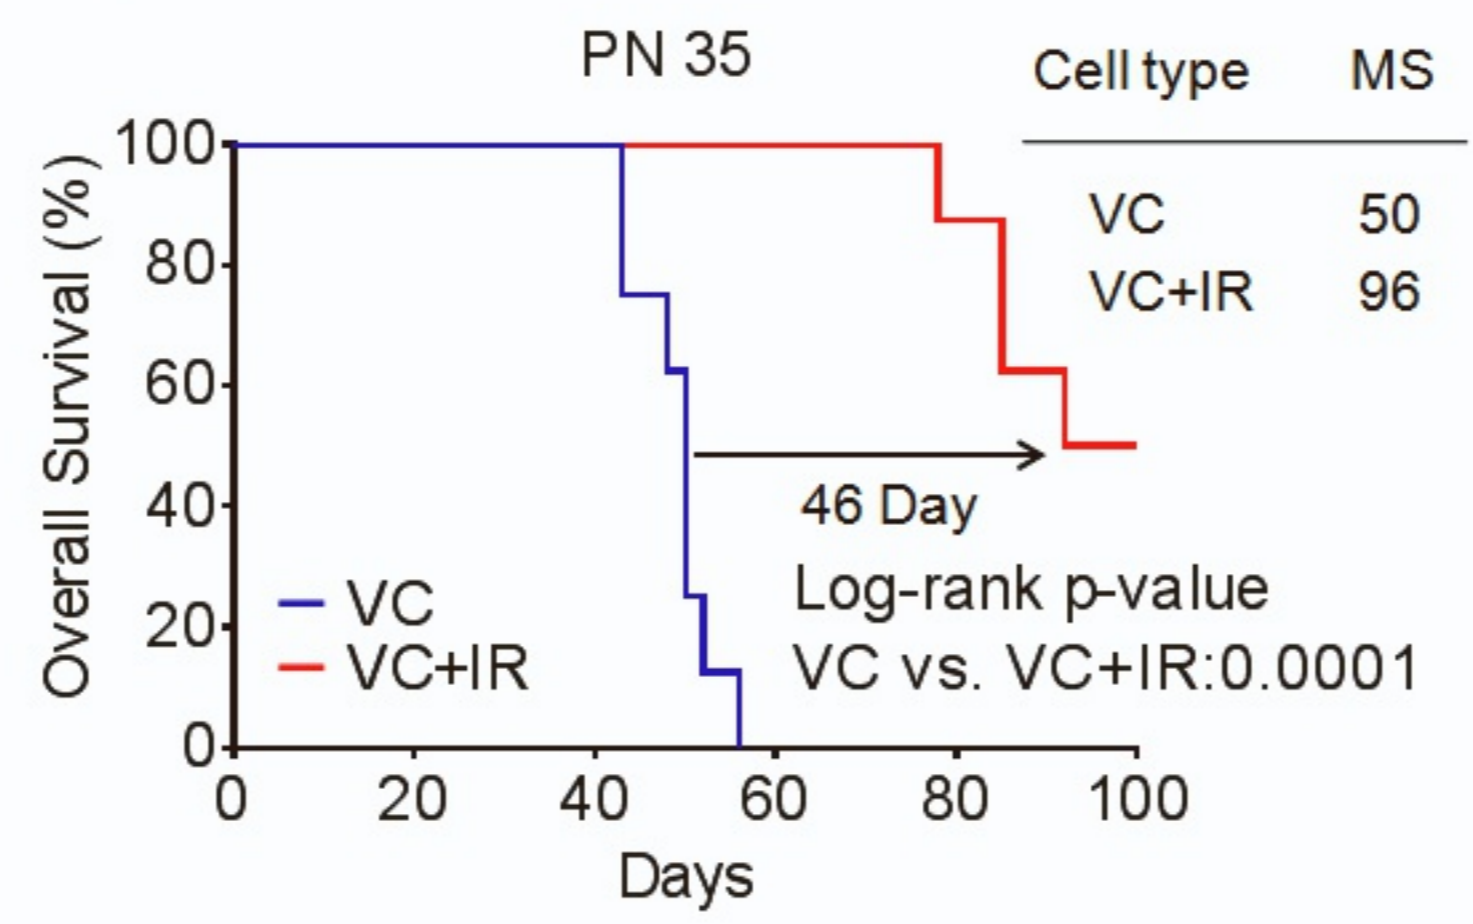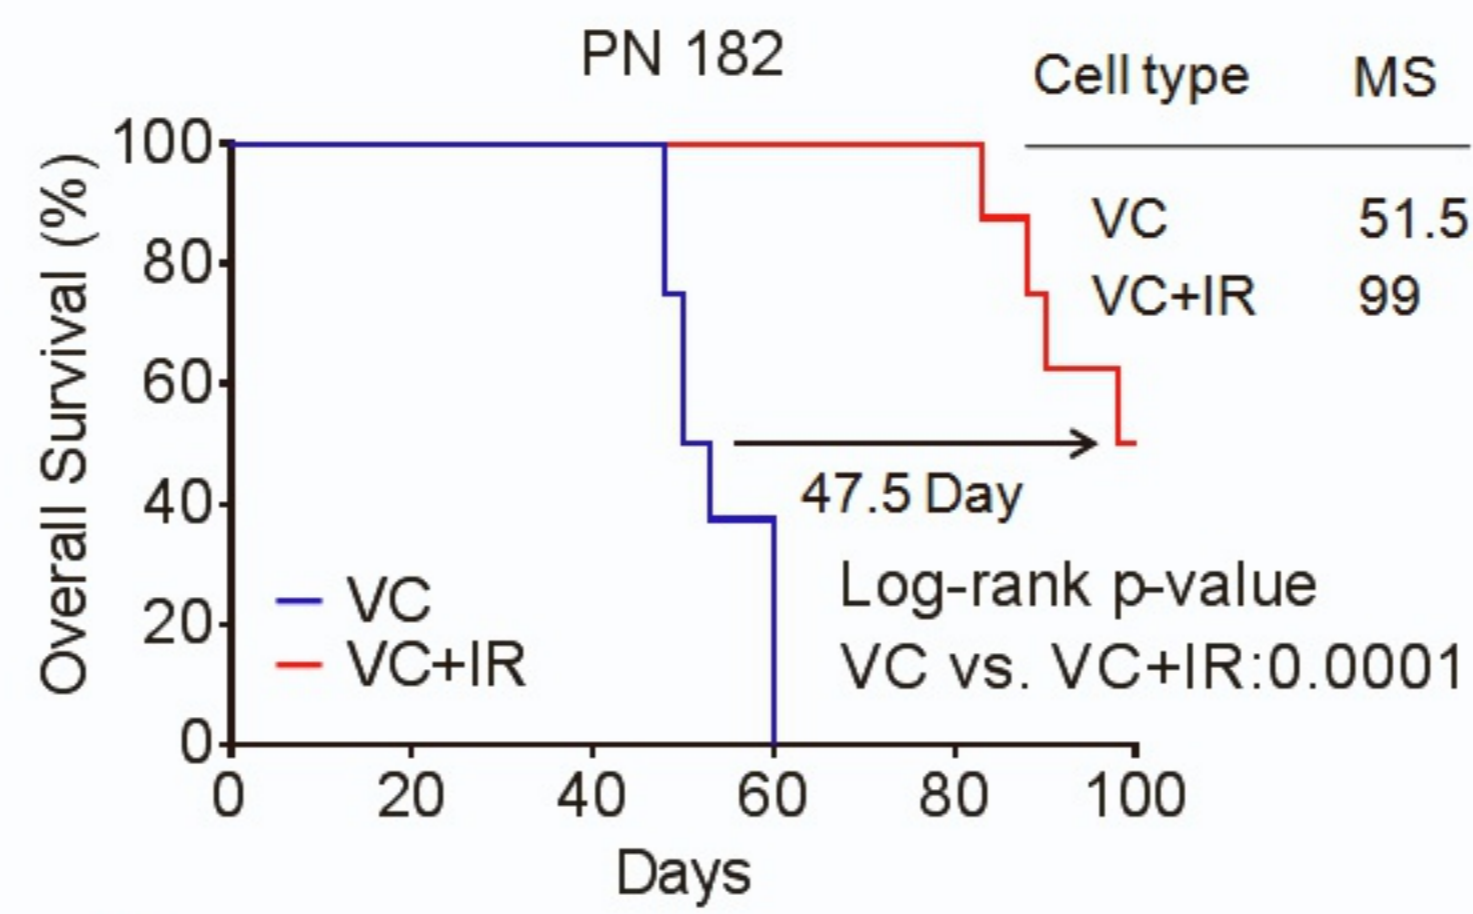

**E**

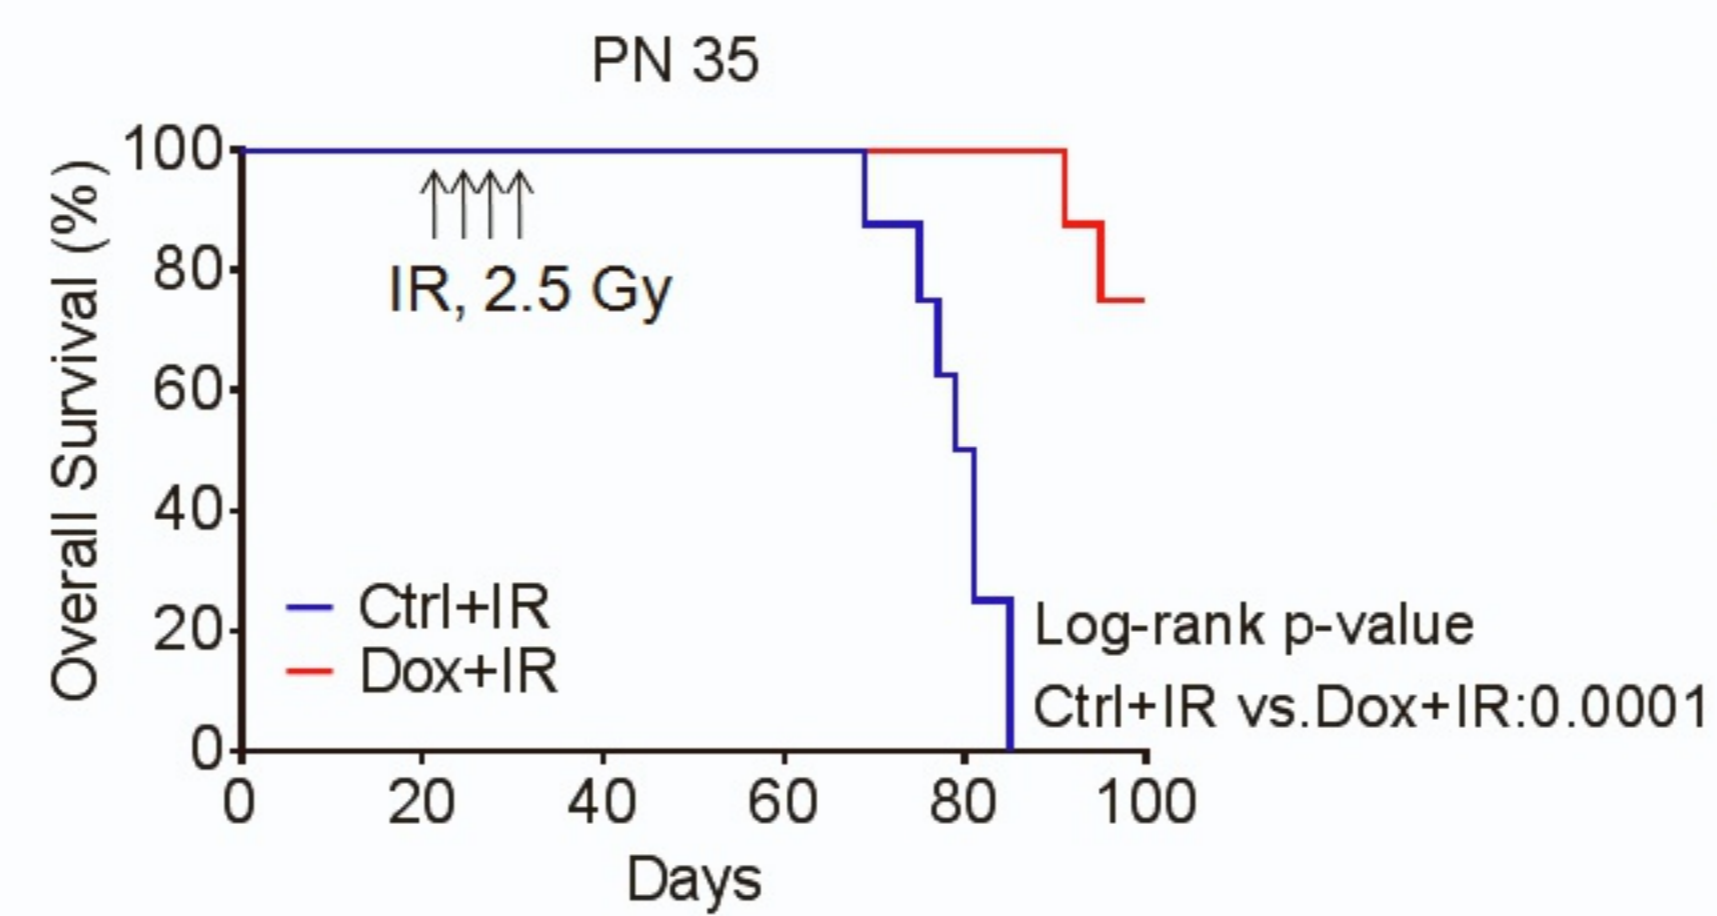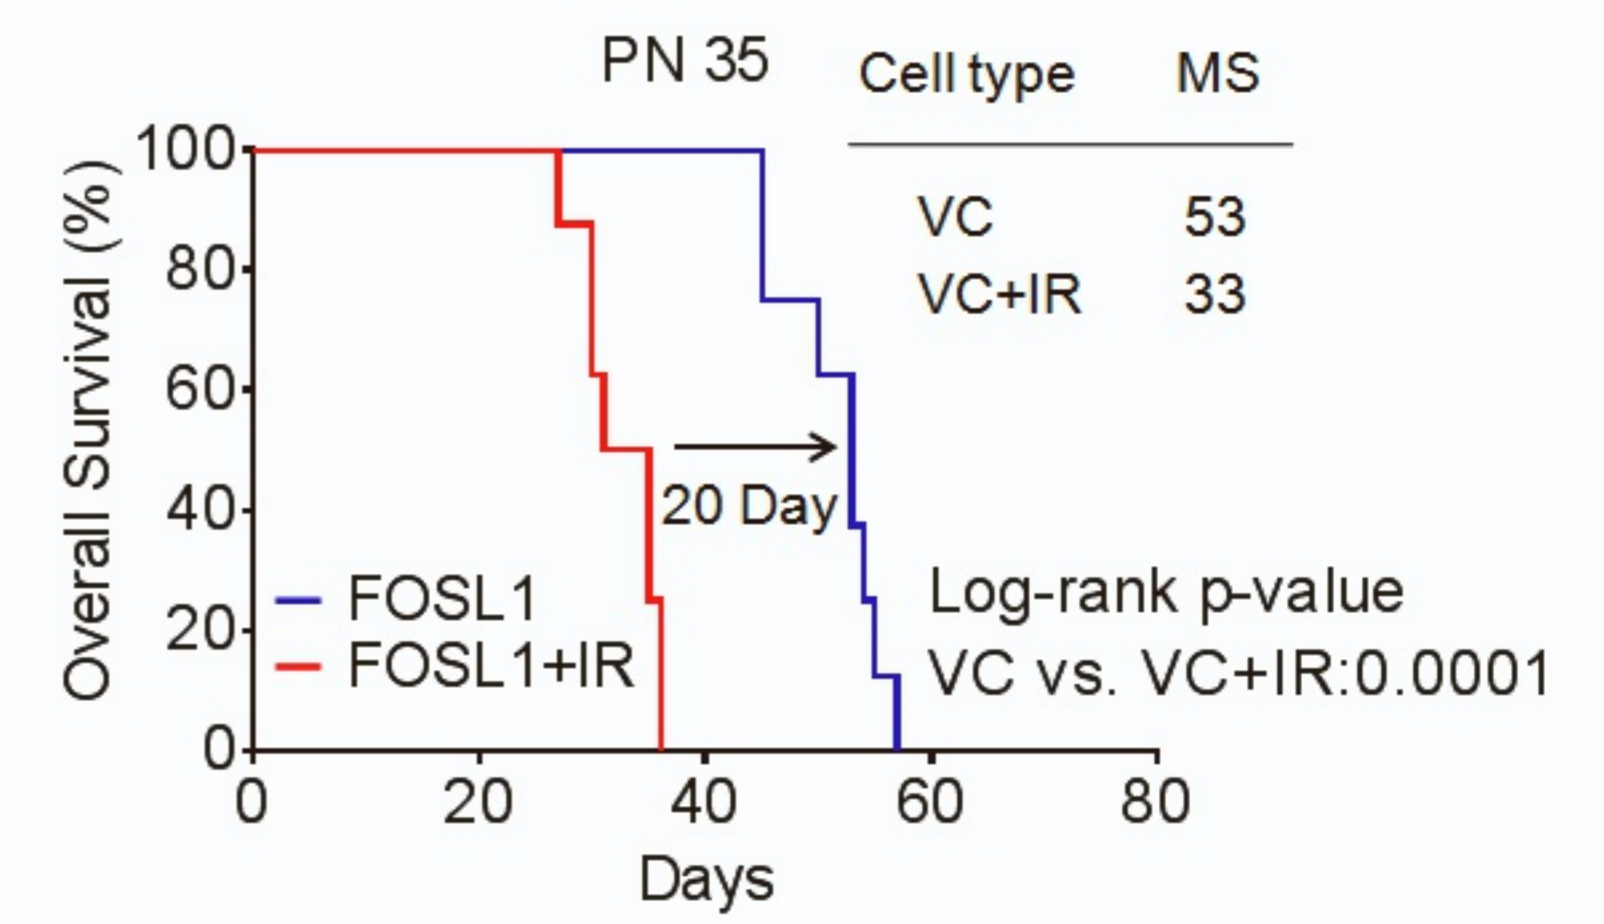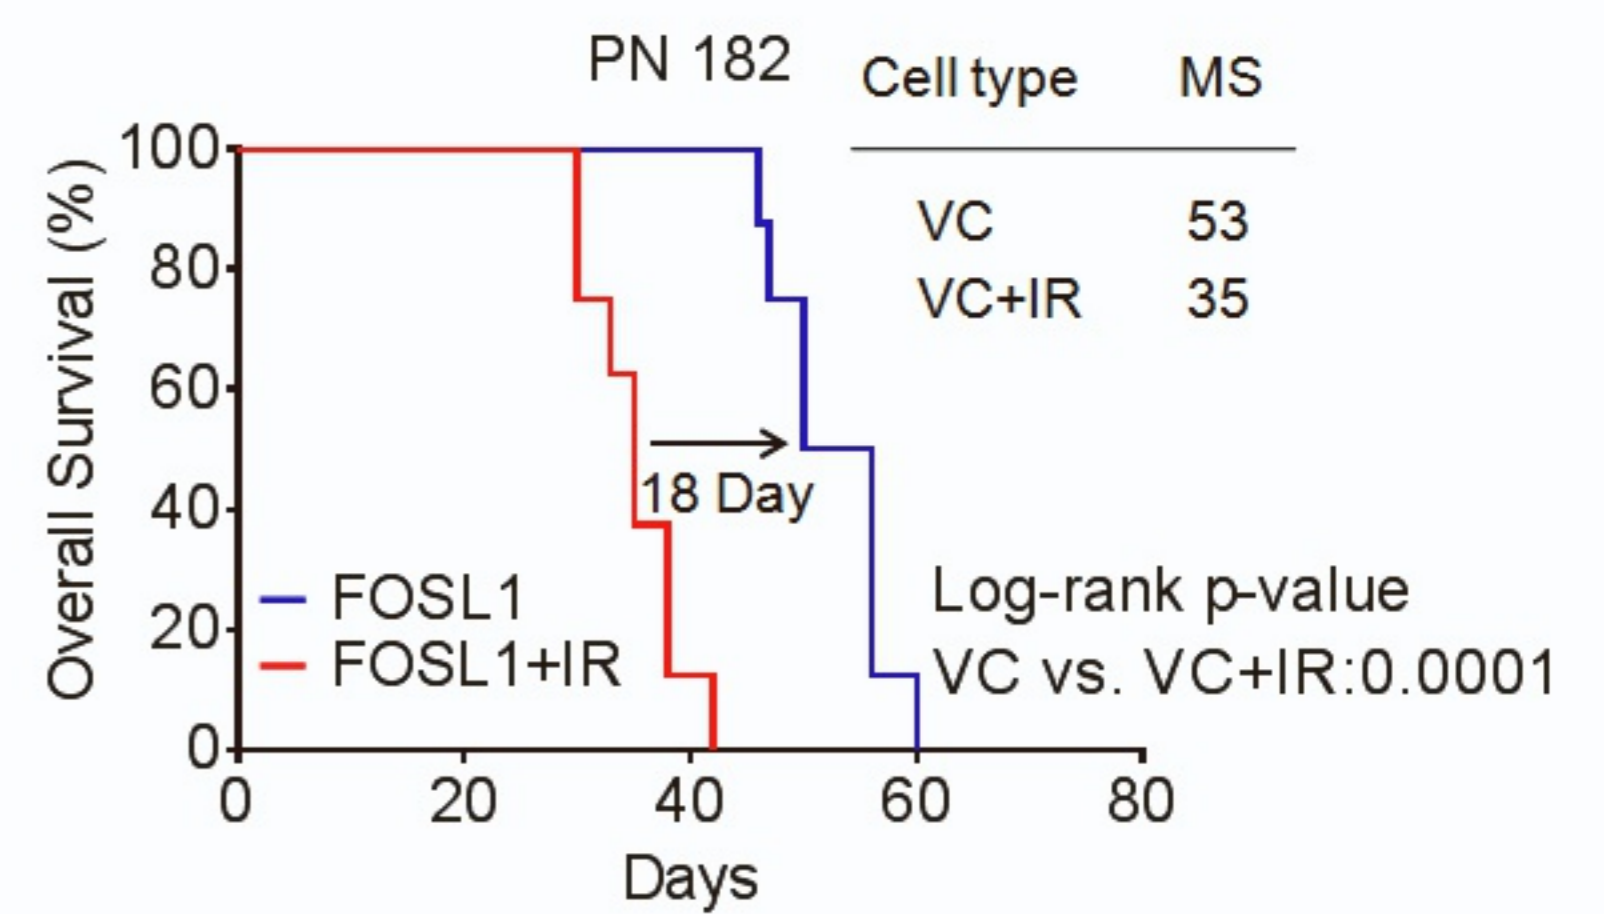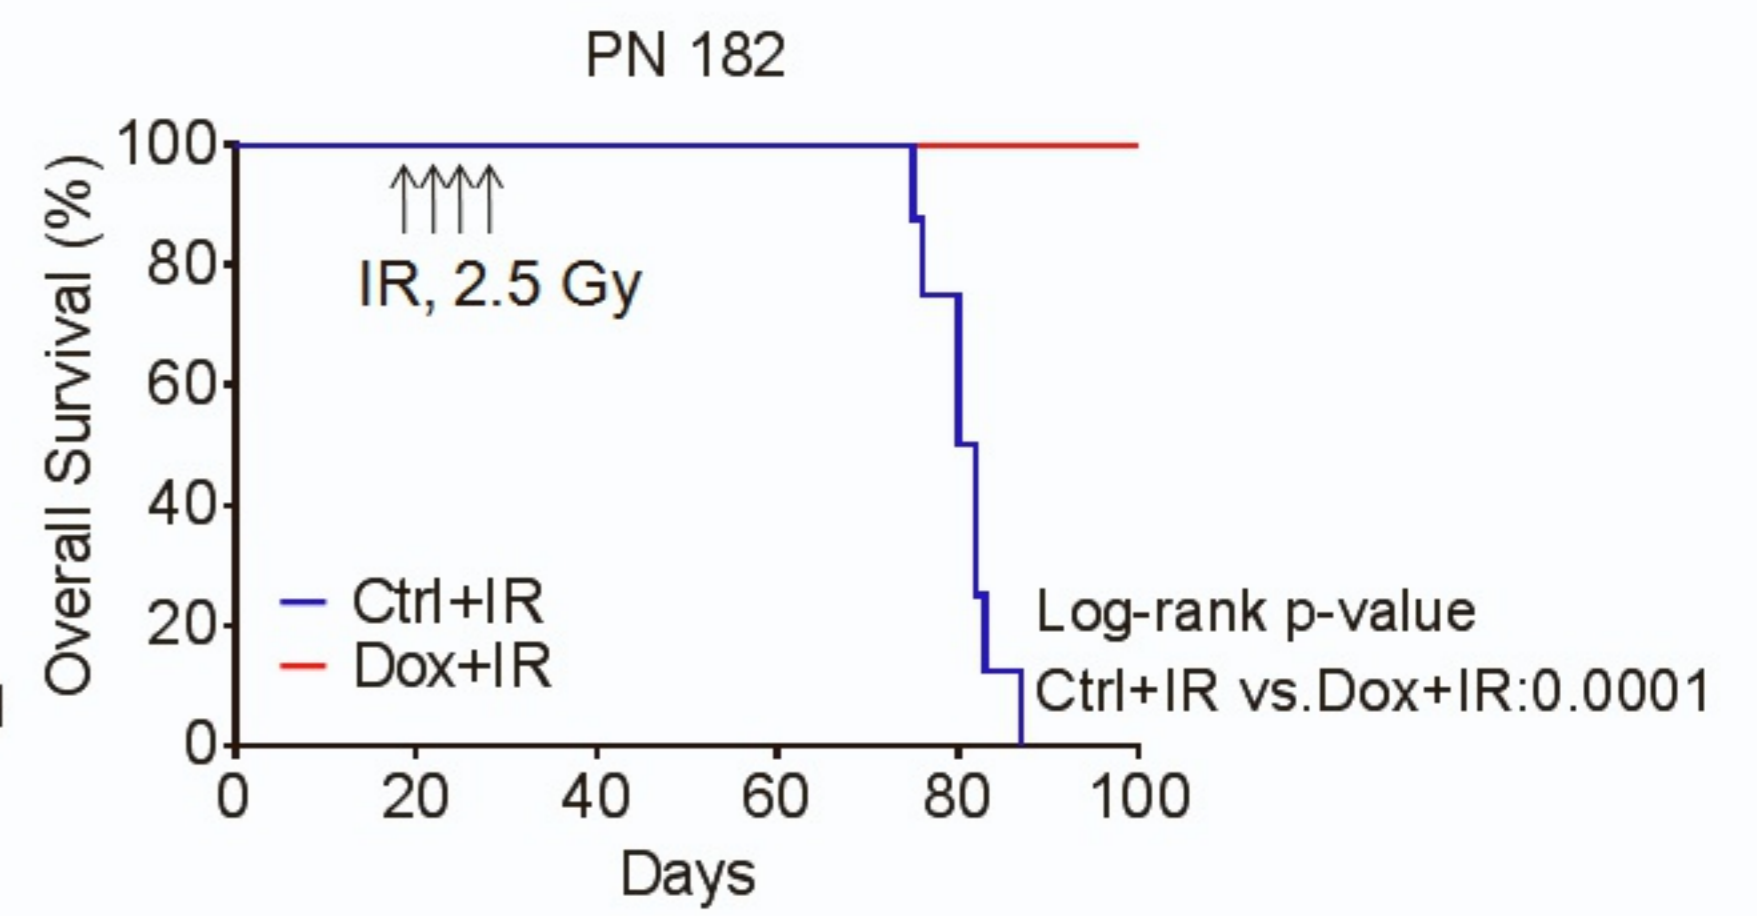



**Figure S2. FOSL1 facilitates IR-induced PMT and radioresistance of PN GSCs**

(A) IB analysis of FOSL1, CD44, C/EBP $\beta$ , TAZ, p-STAT3 and STAT3 in PN 35 and PN 182 GSCs at the indicated time points after treatment with 10 ng/ml TNF- $\alpha$ .  $\alpha$ -tubulin as internal control. (B) IB analysis of indicated antibodies in PN 35 and PN 182 GSCs transduced with Dox-inducible lentiviral vectors expressing FOSL1 shRNA or control shRNA in the presence or absence of 10 ng/ml TNF- $\alpha$  for 48 h.  $\alpha$ -tubulin as internal control. (C) Kaplan-Meier survival curves of mice intracranially implanted PN 35 and PN 182 GSCs with vector control or FOSL1 overexpression following IR treatment. IR was performed on week 3 after implantation for 4 consecutive days at 2.5 Gy/day. (D) Representative IF images of  $\gamma$ H2AX foci in FOSL1 or vector control-transduced PN 35 and PN 182 GSCs for 1 h and 24 h post-IR. (E) Kaplan-Meier survival curves of mice intracranially implanted PN 35 and PN 182 GSCs with Dox-inducible lentiviral vectors expressing FOSL1 shRNA or control shRNA in response to IR. The arrows indicate the time of IR.



# Supplemental Figure 3

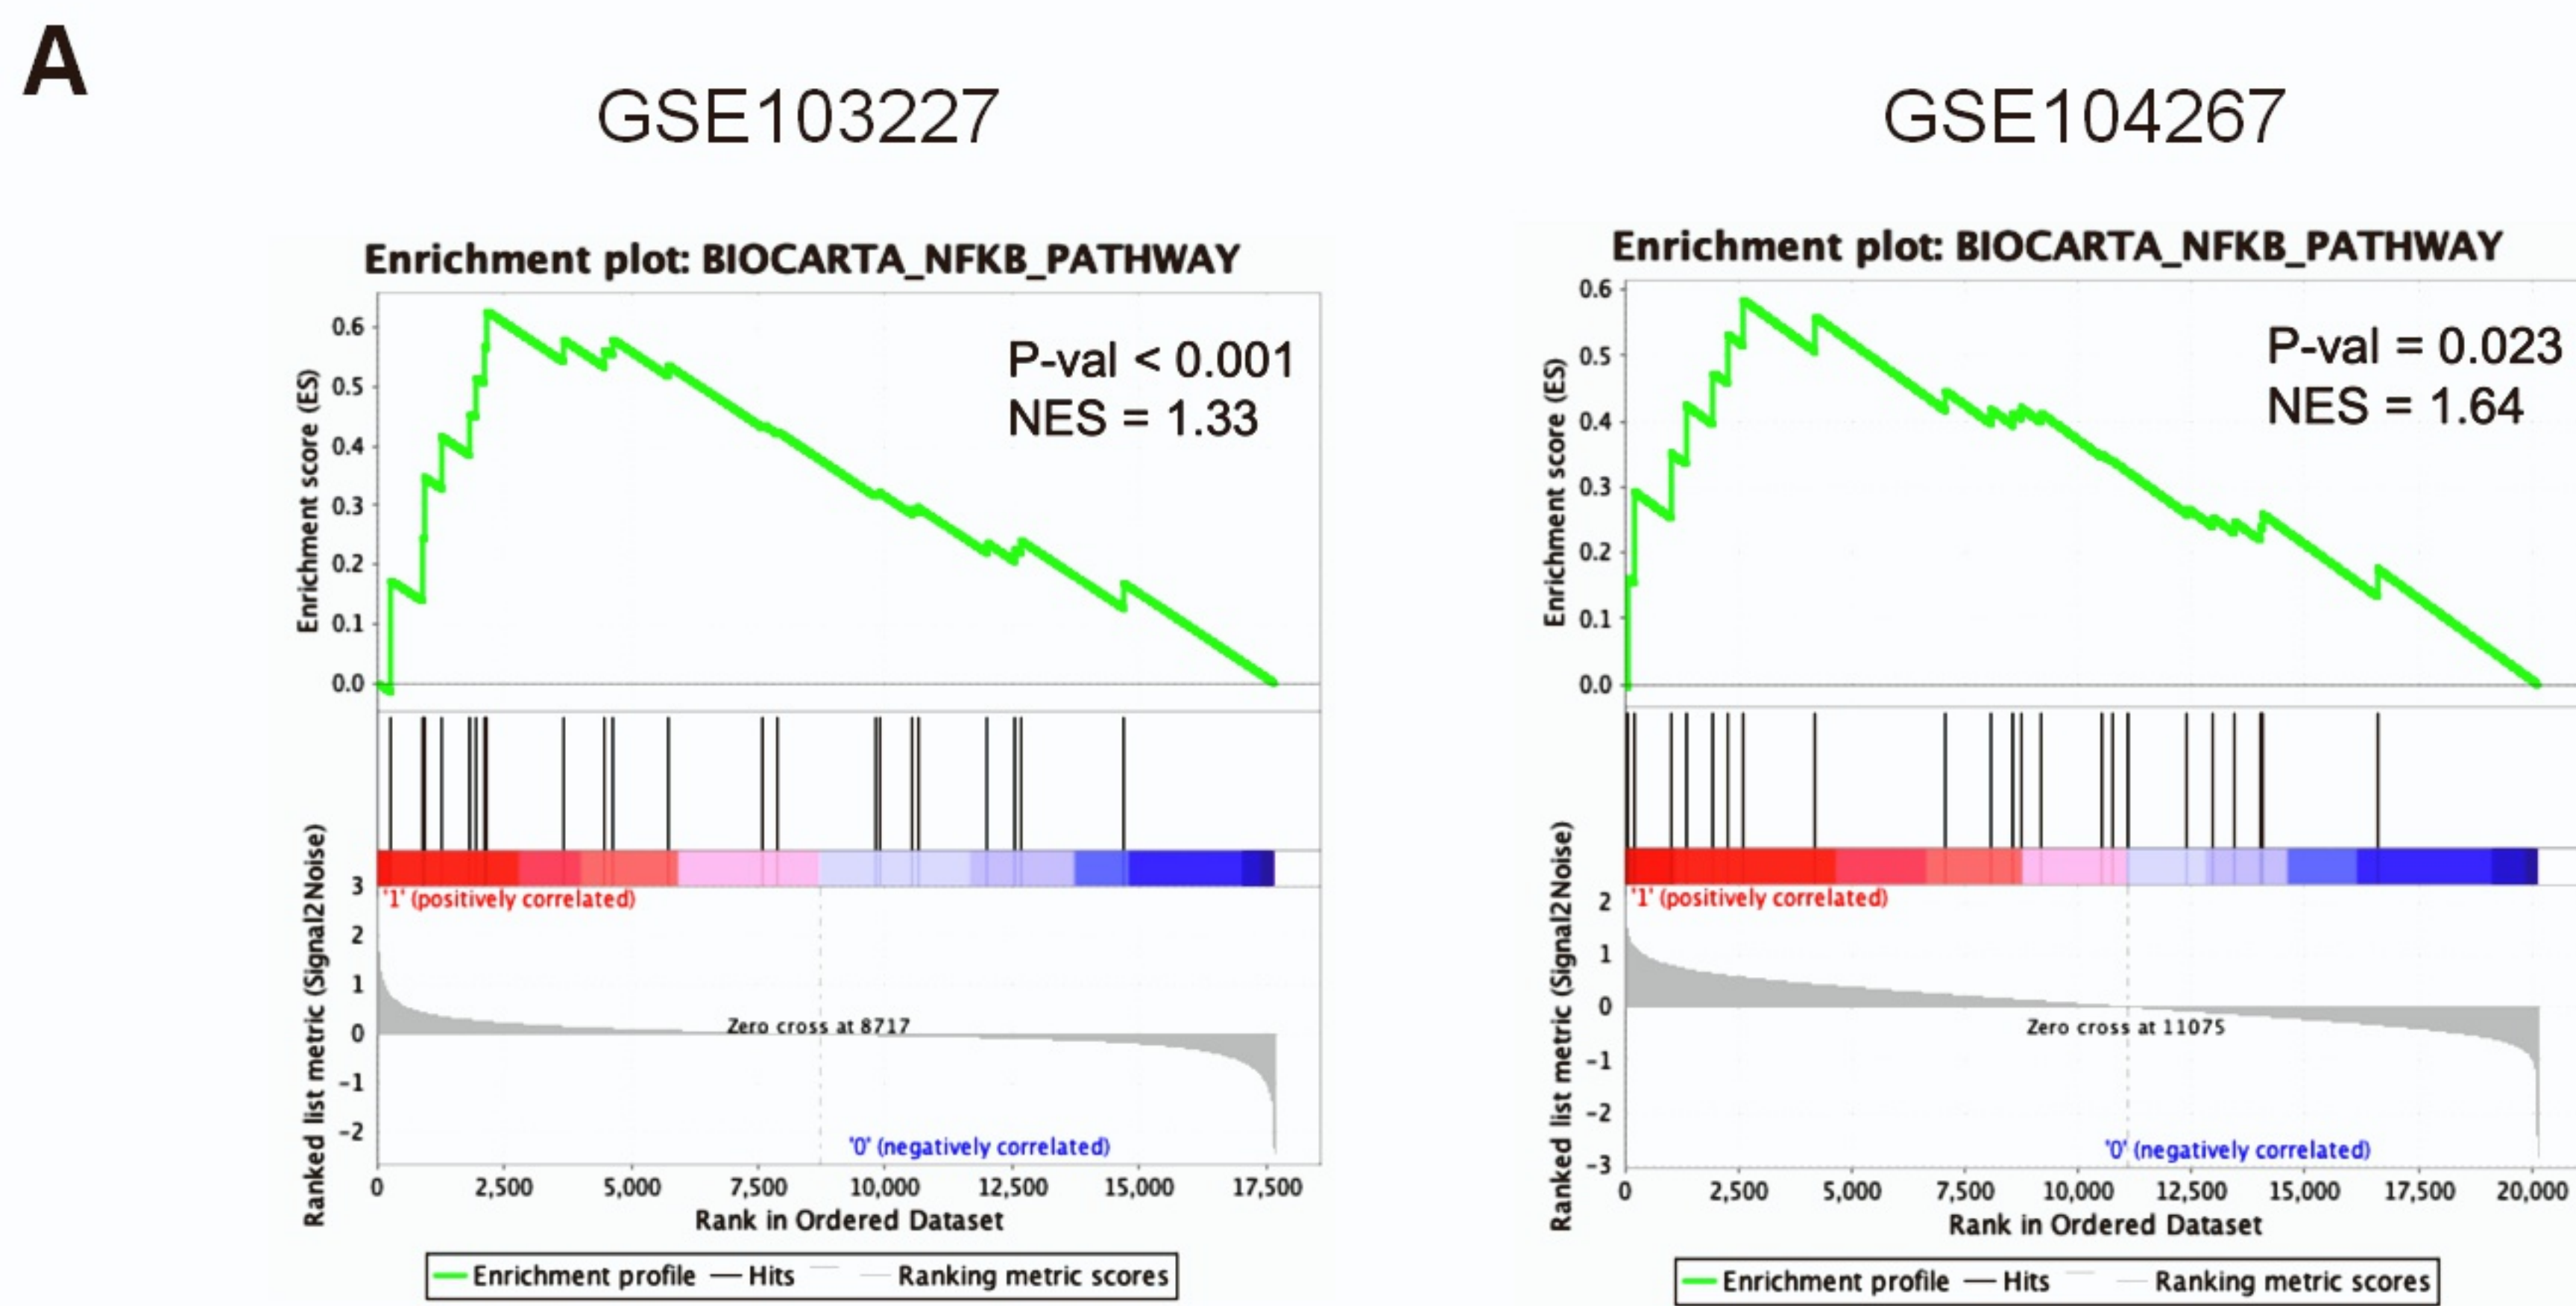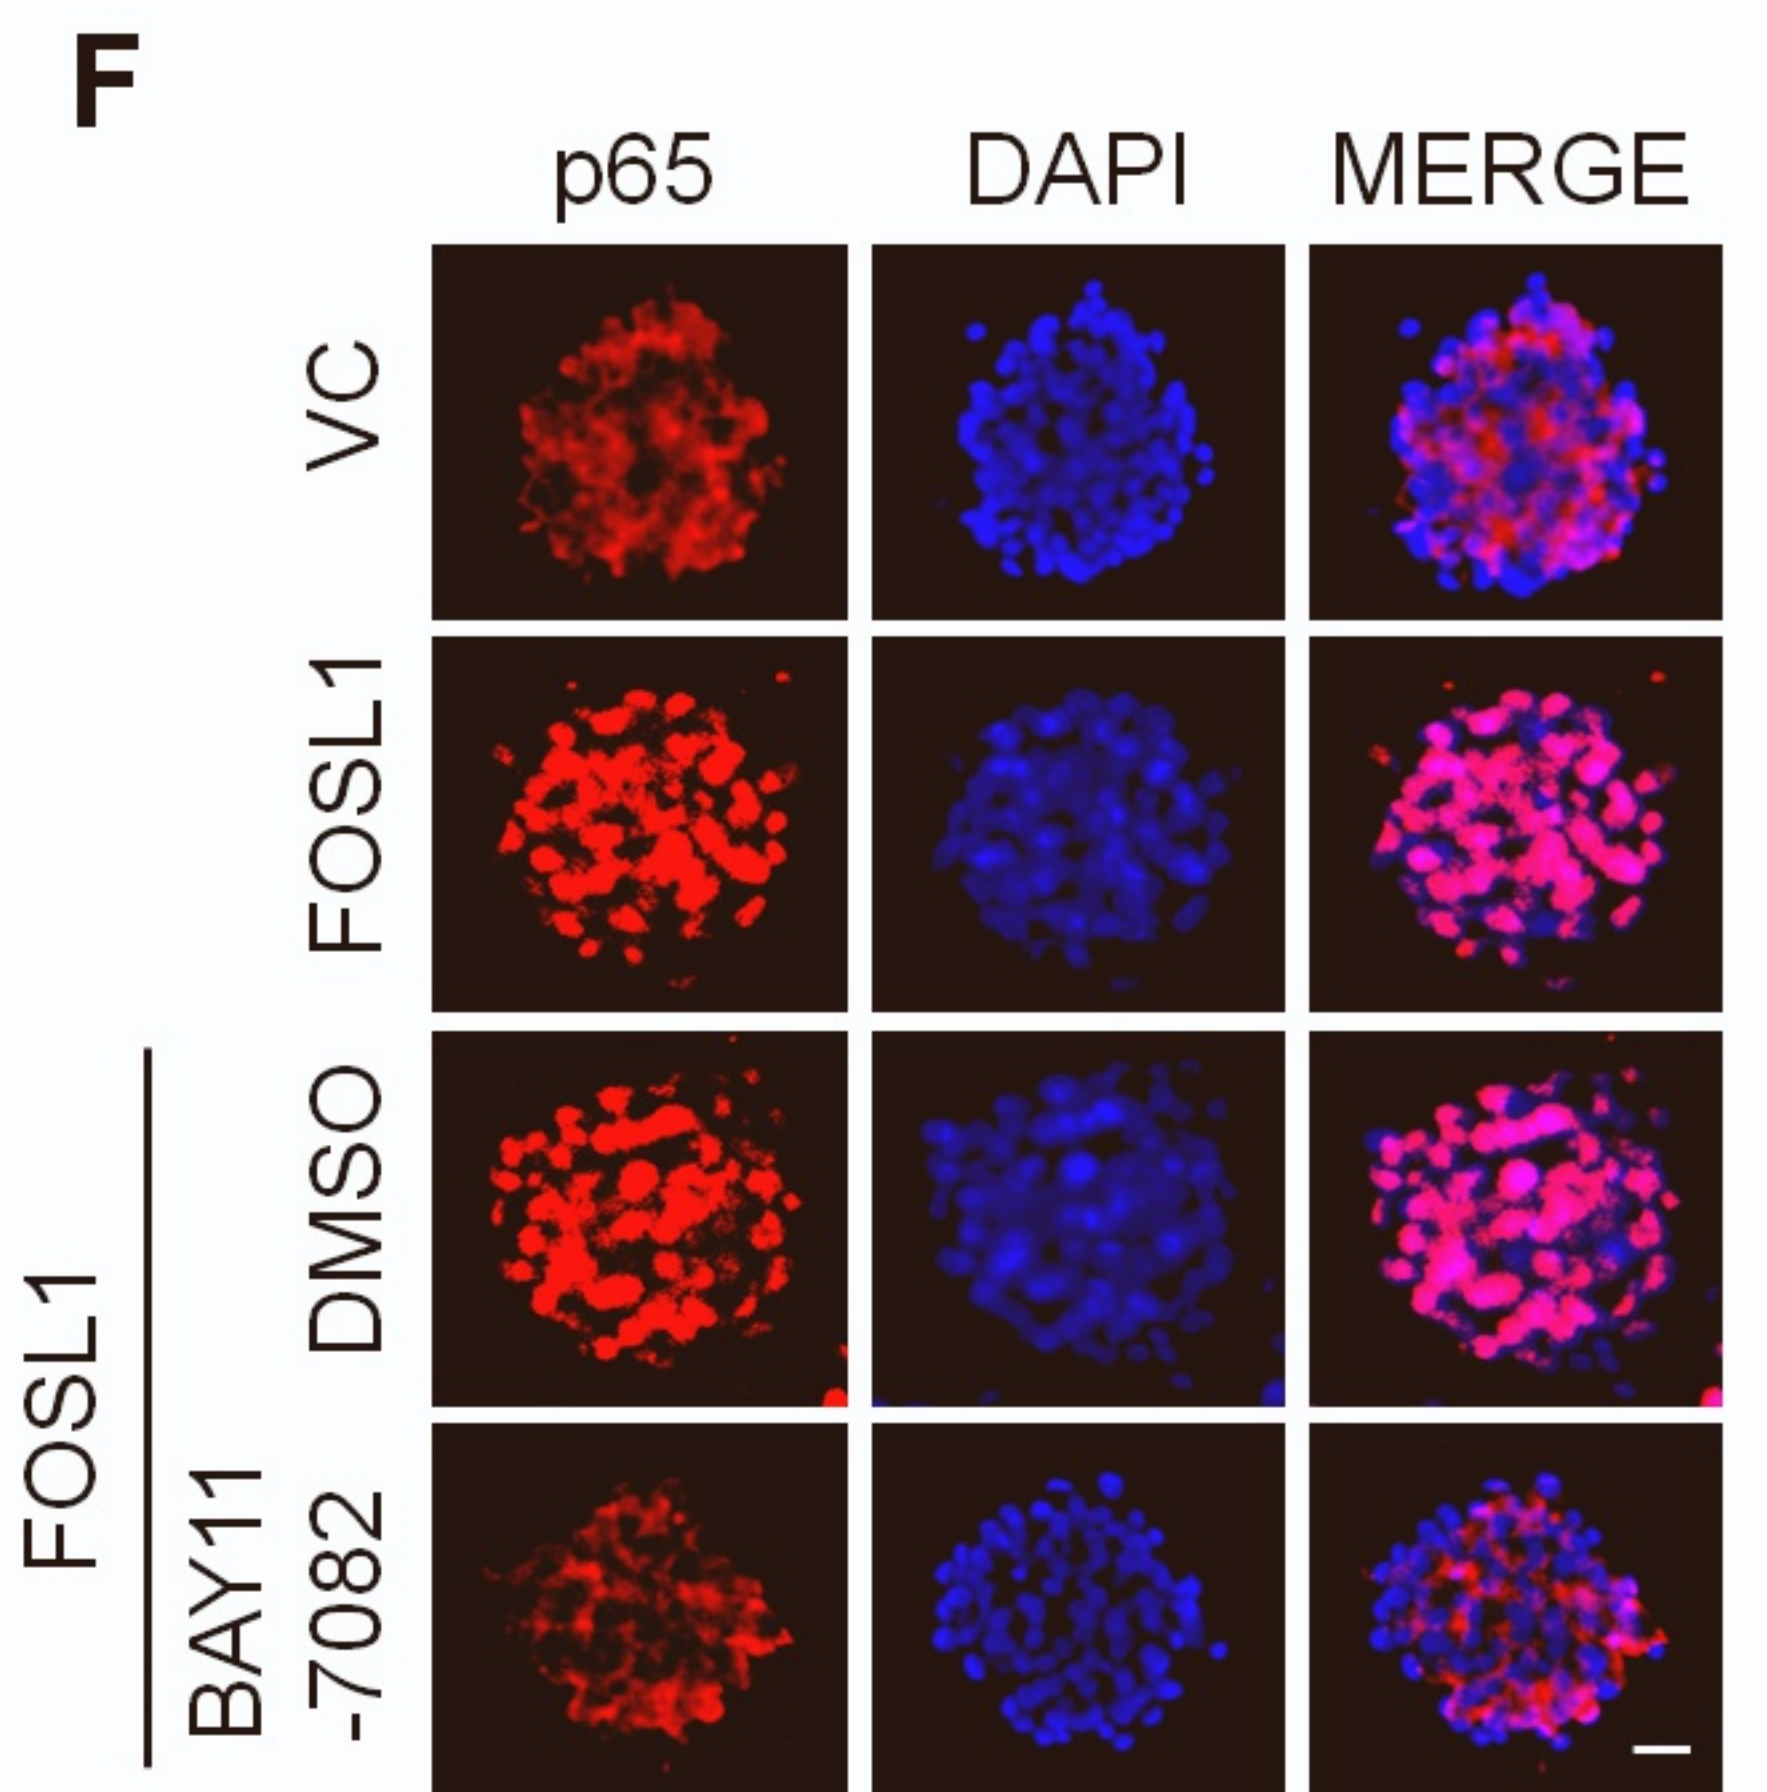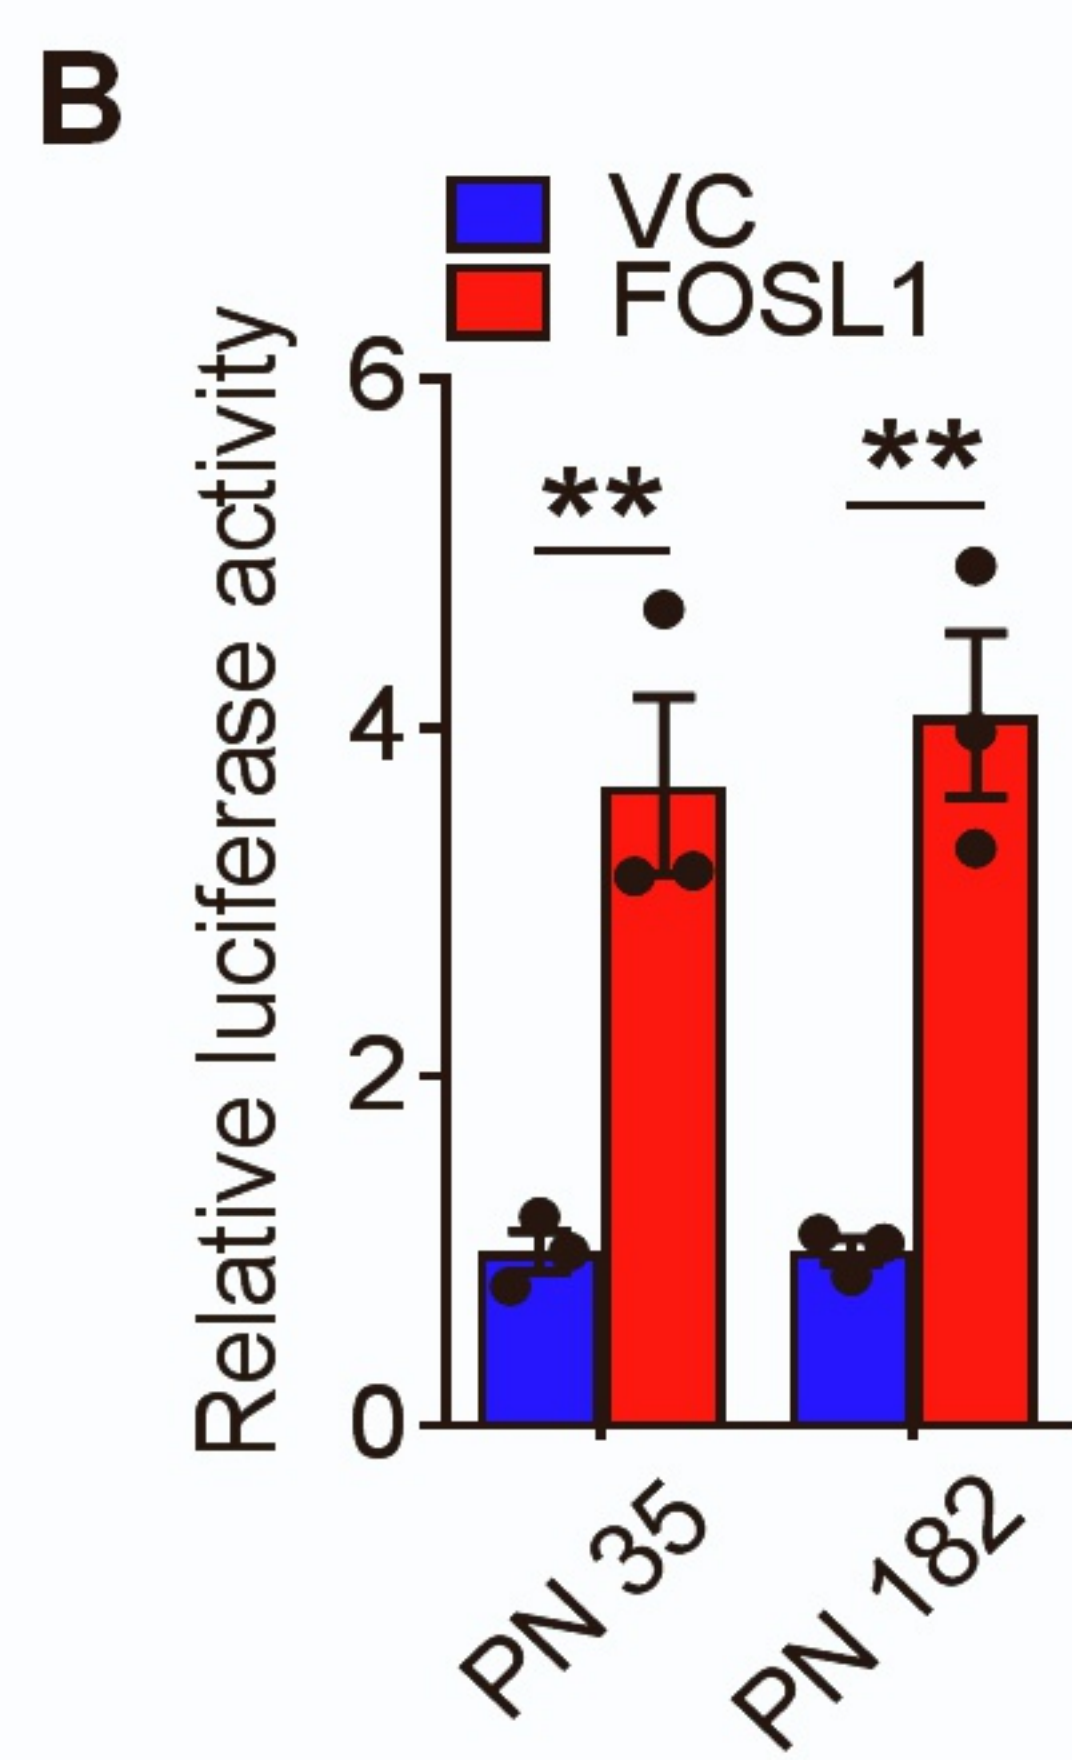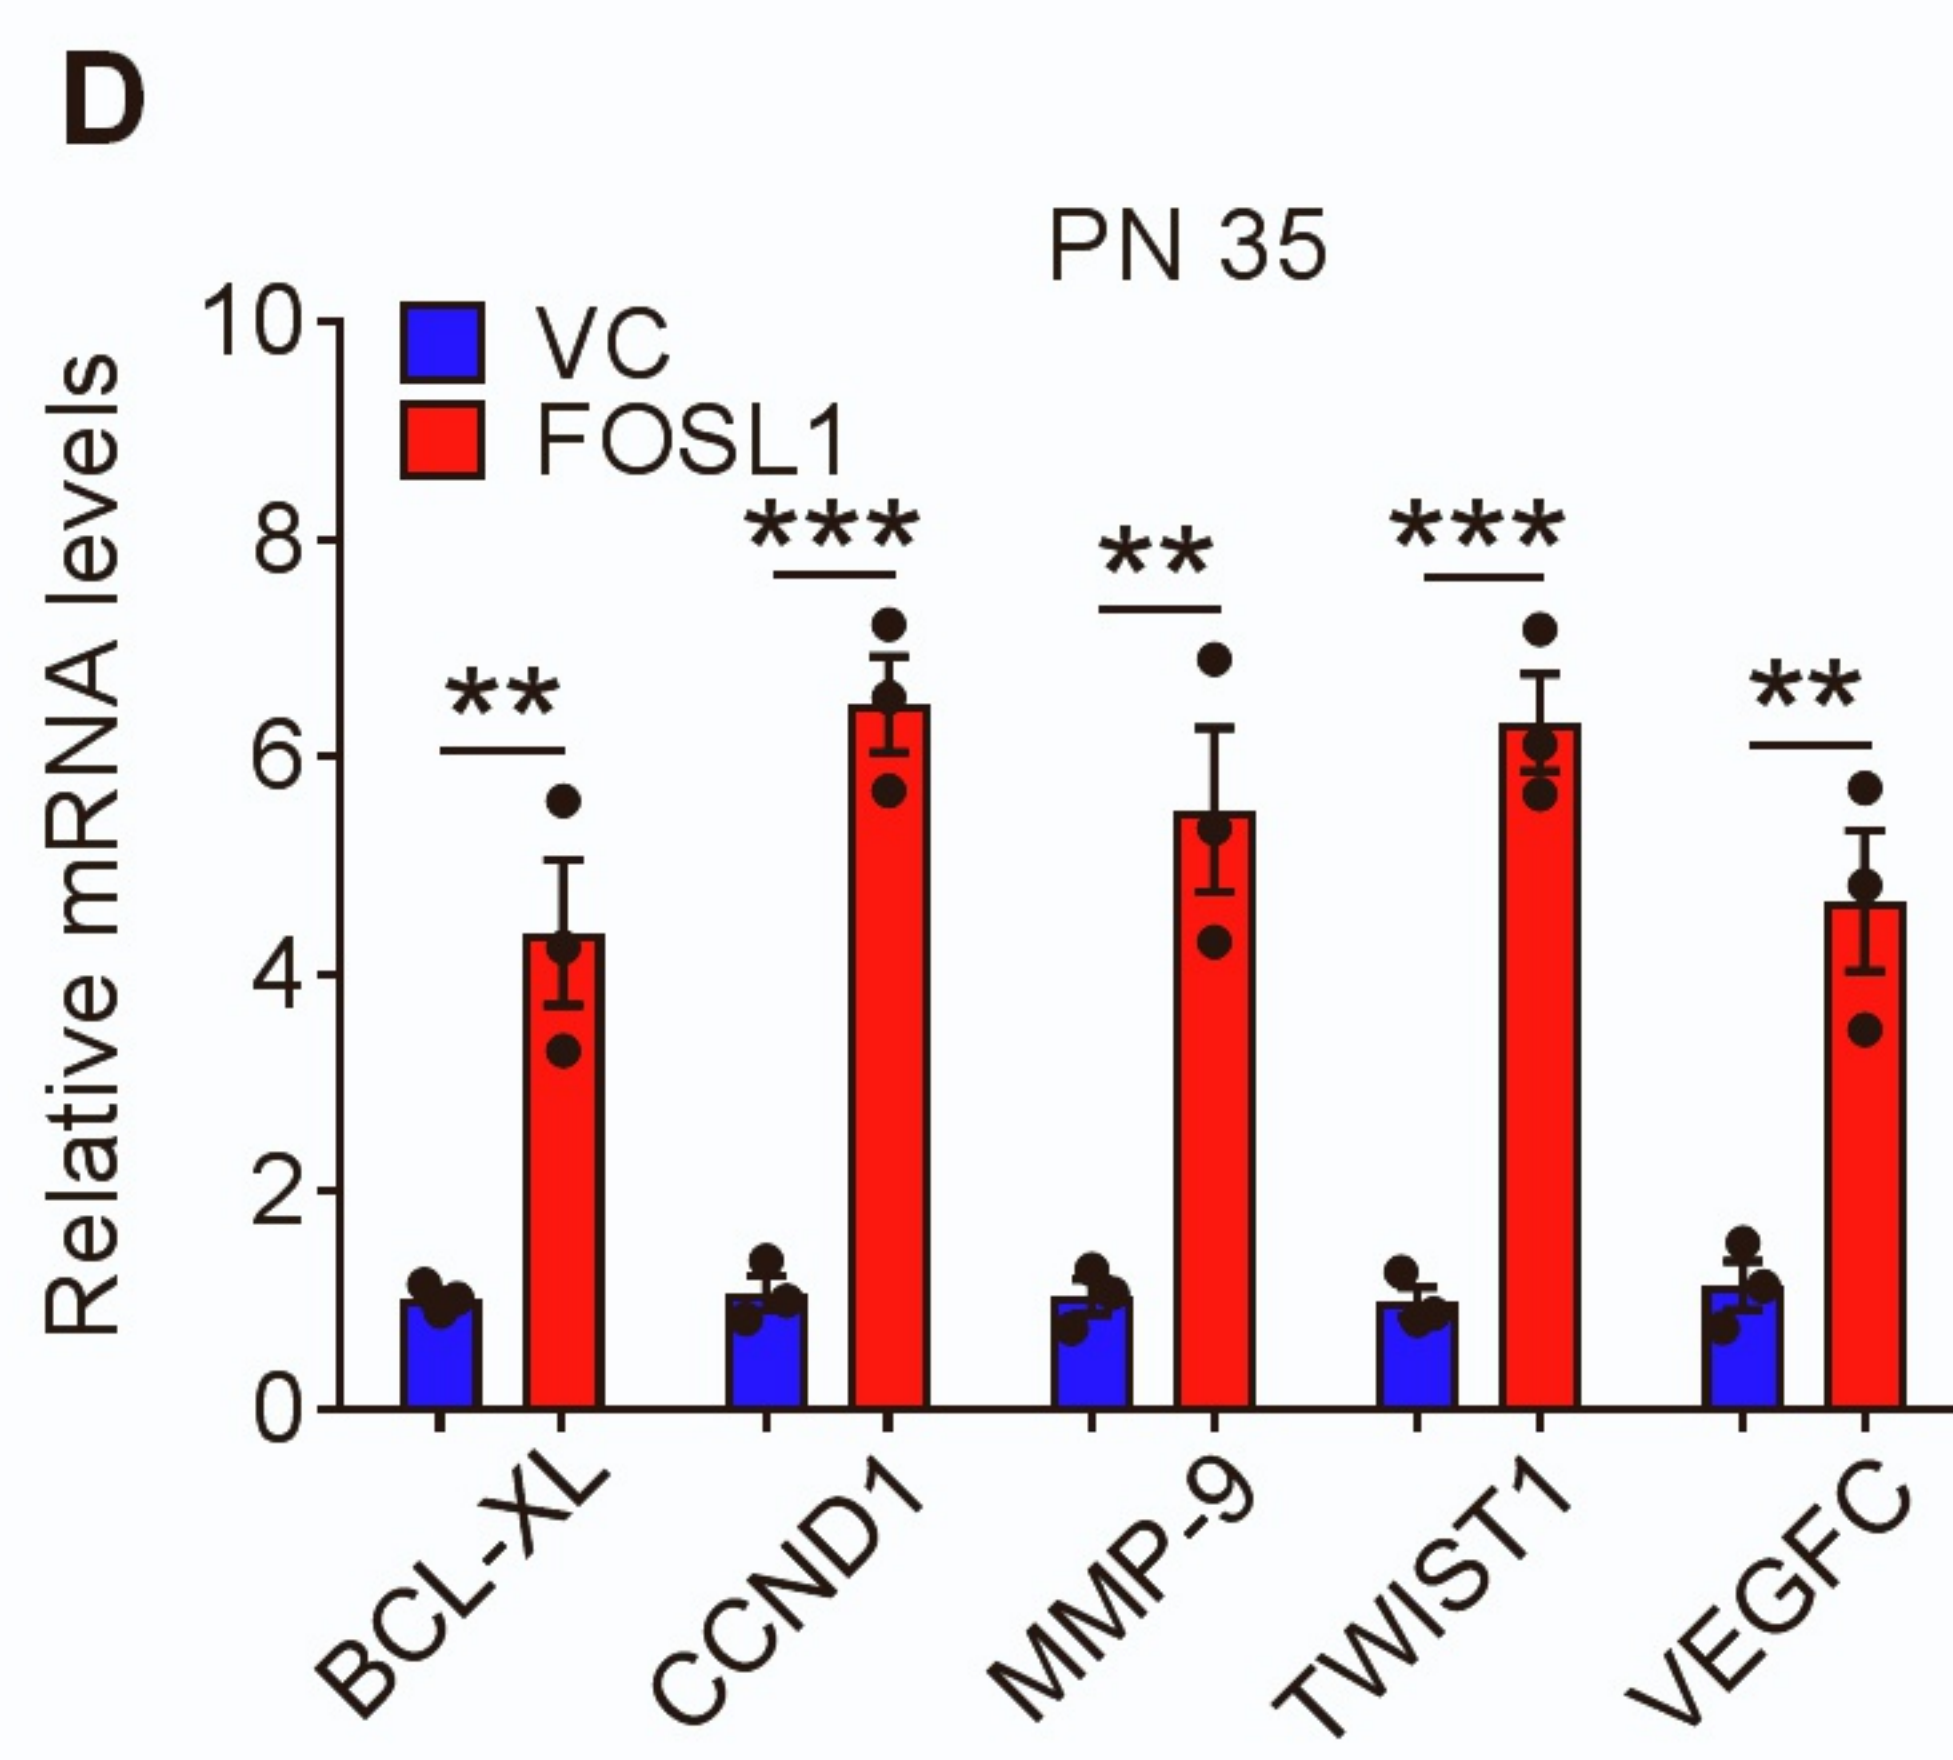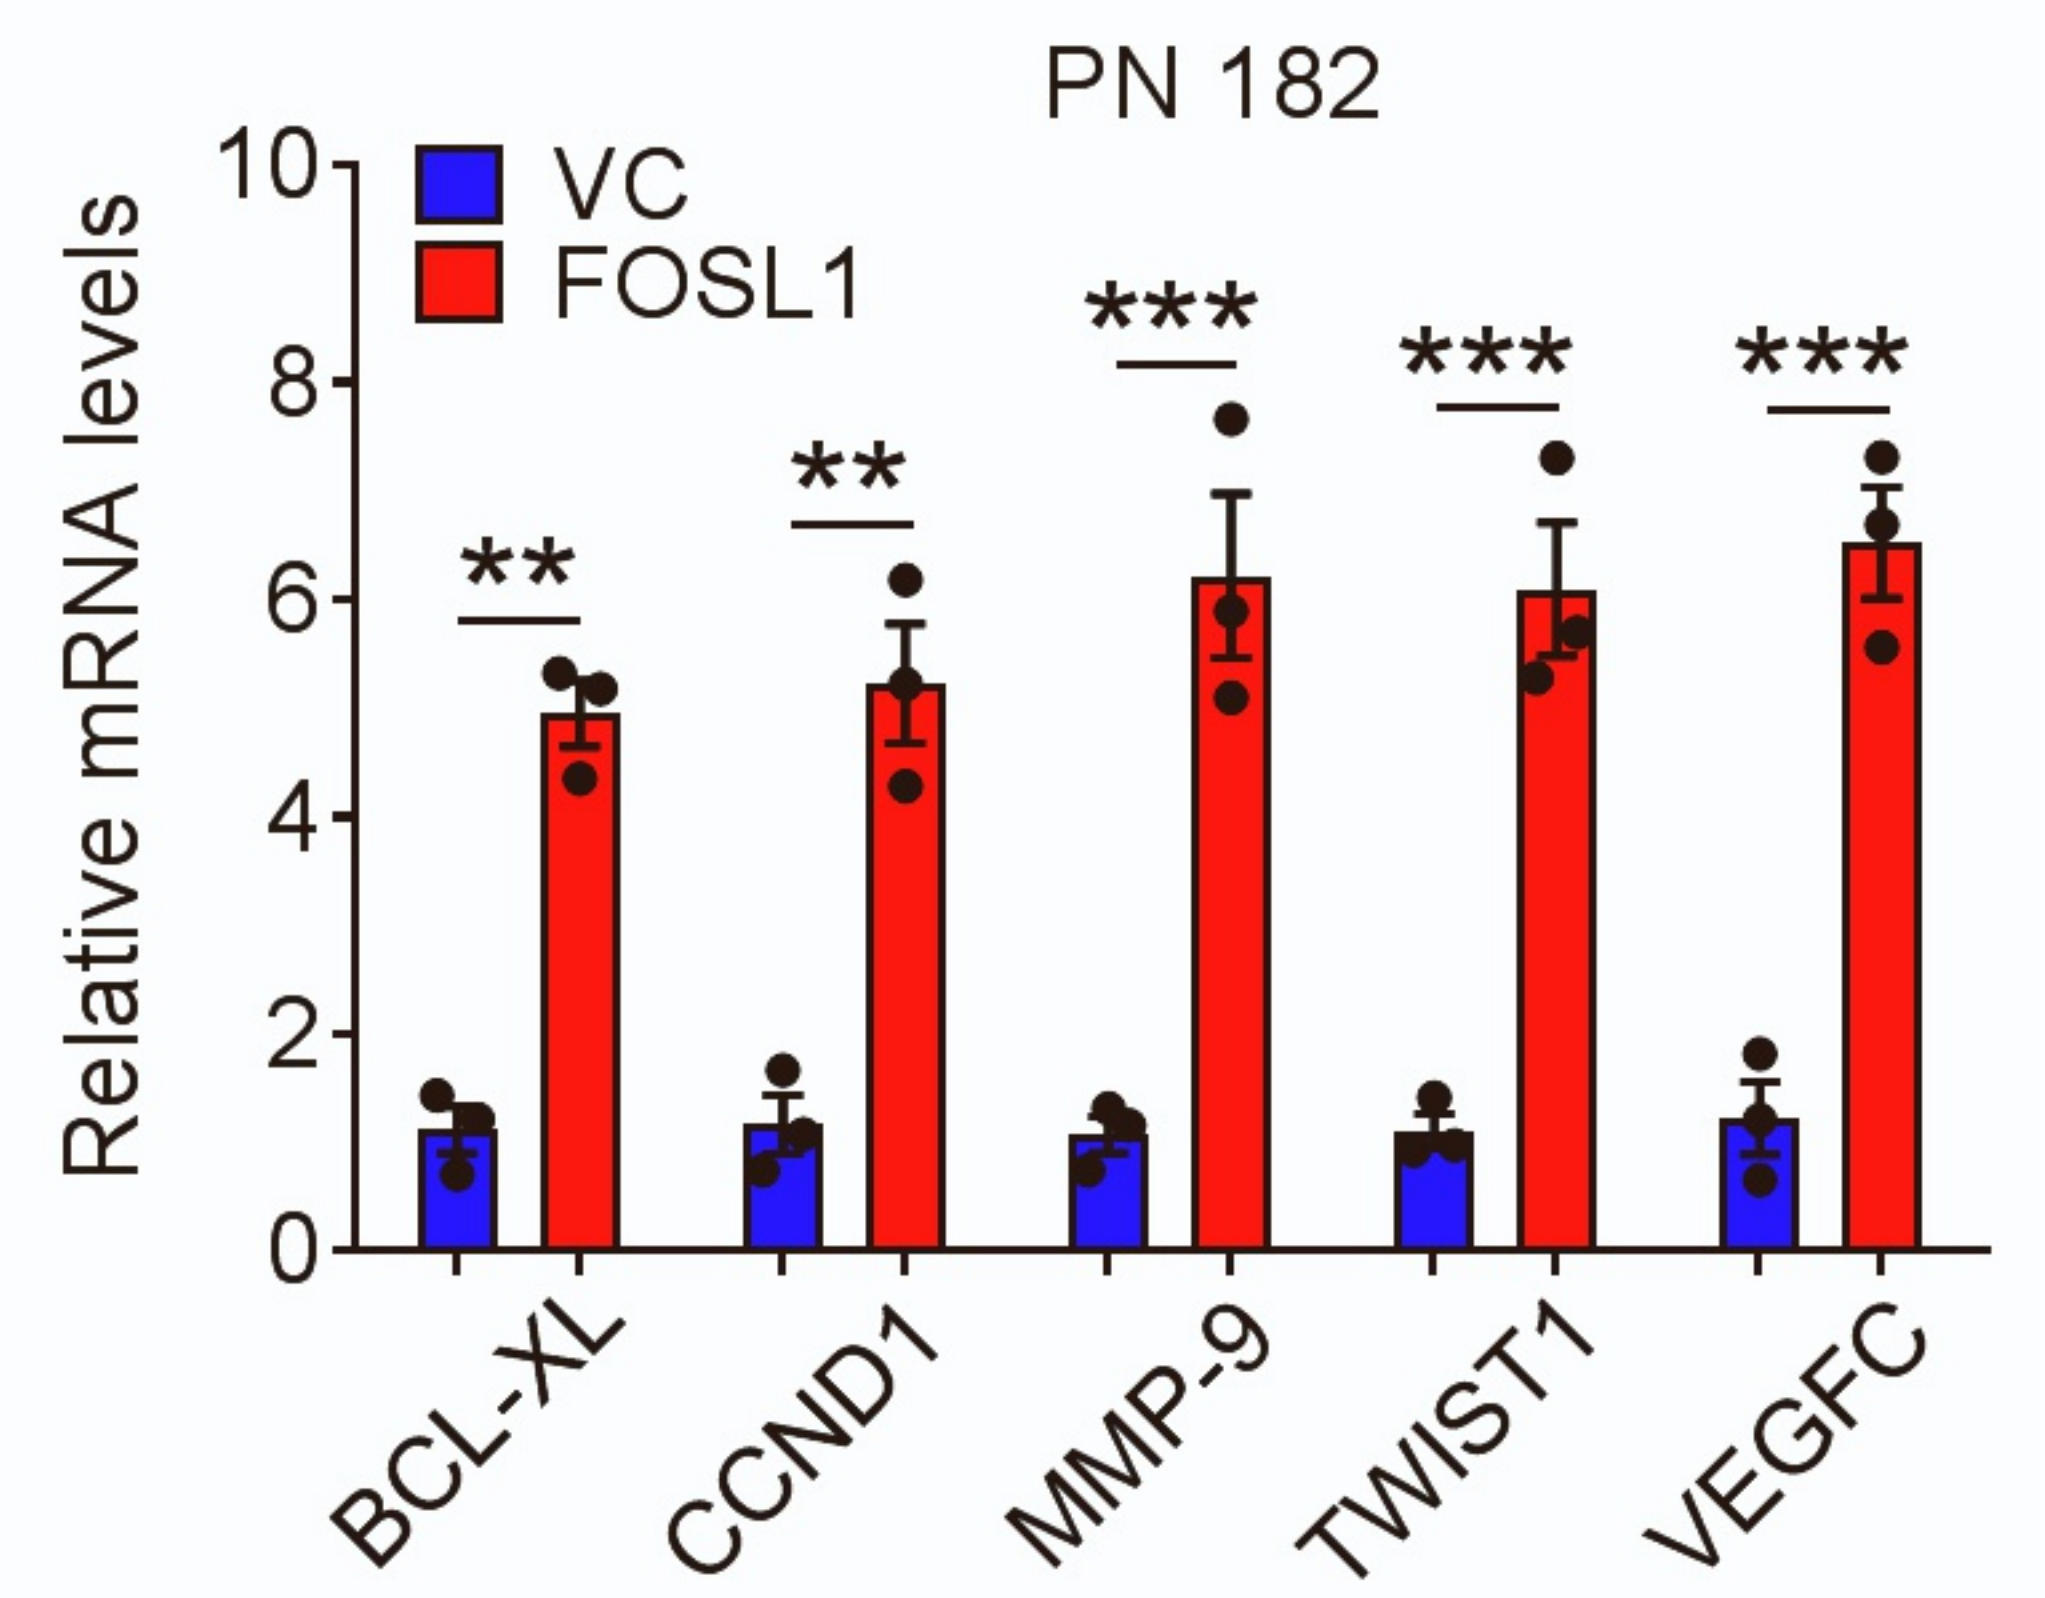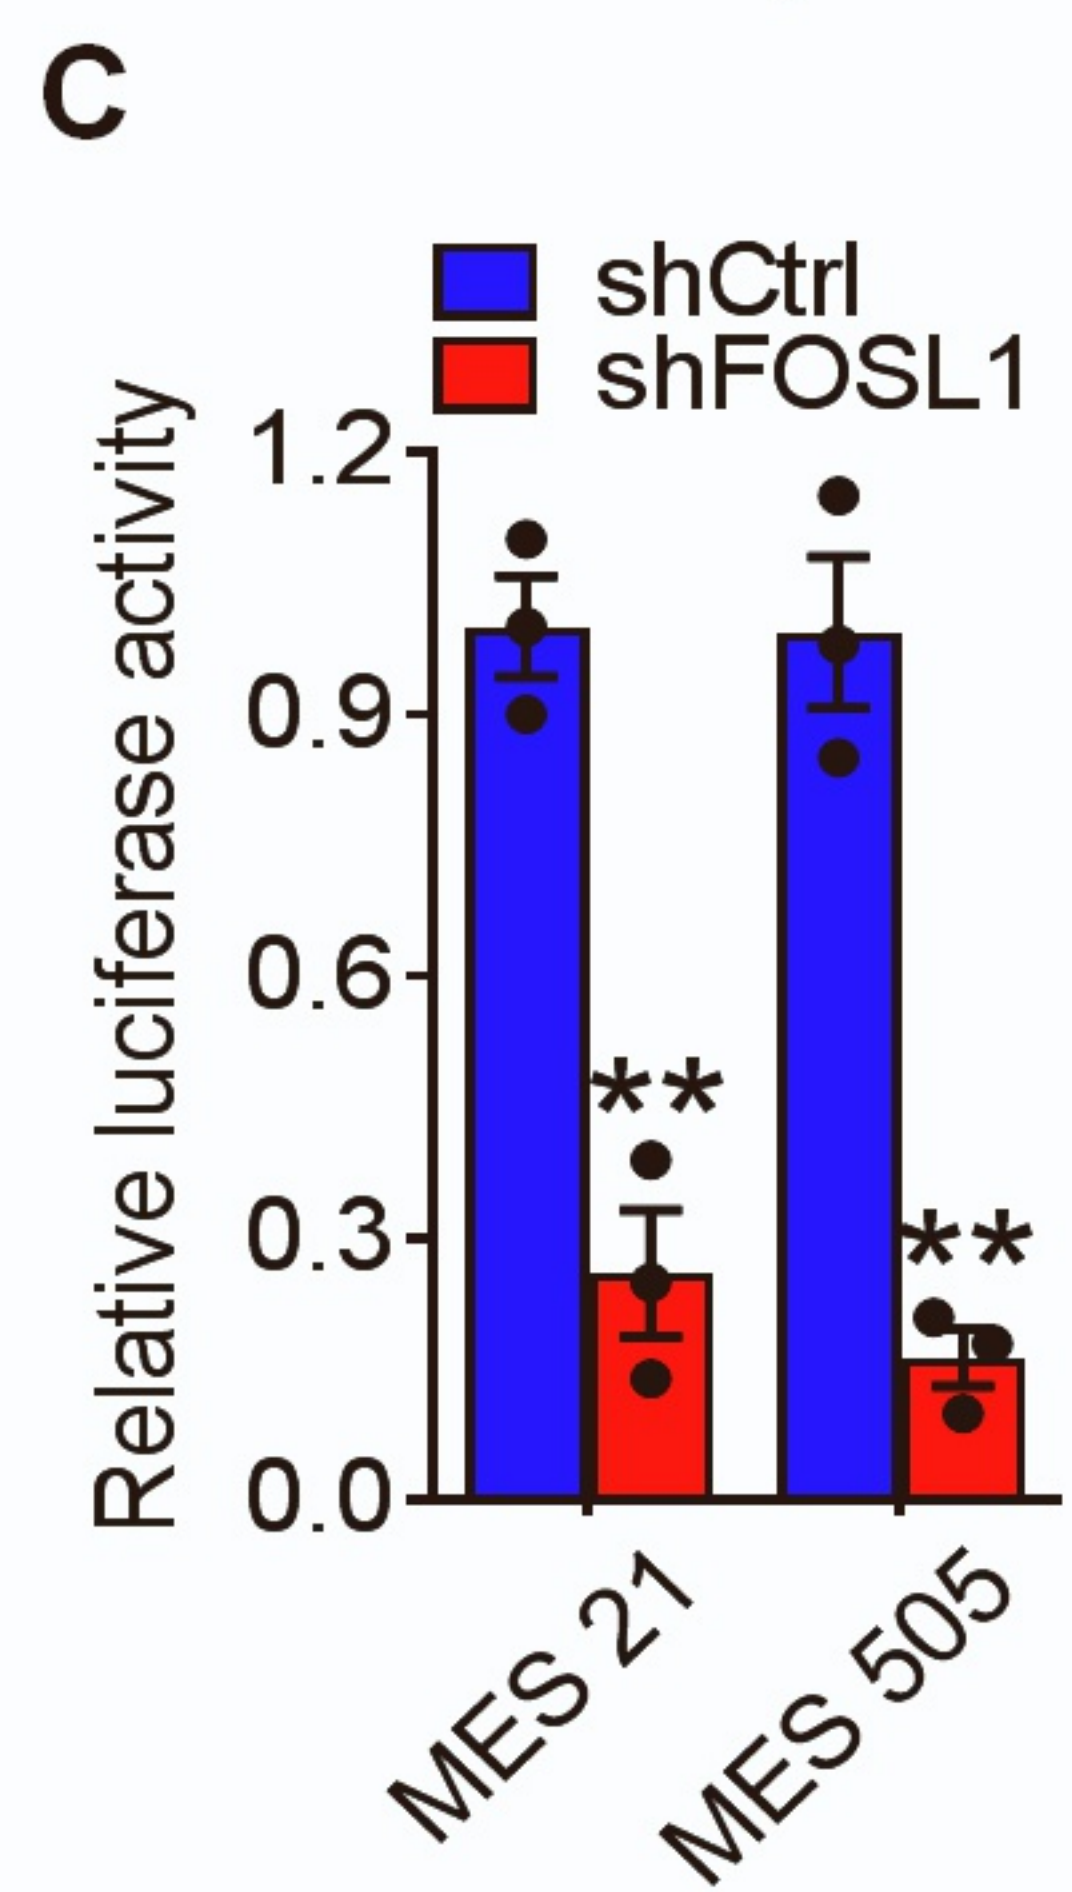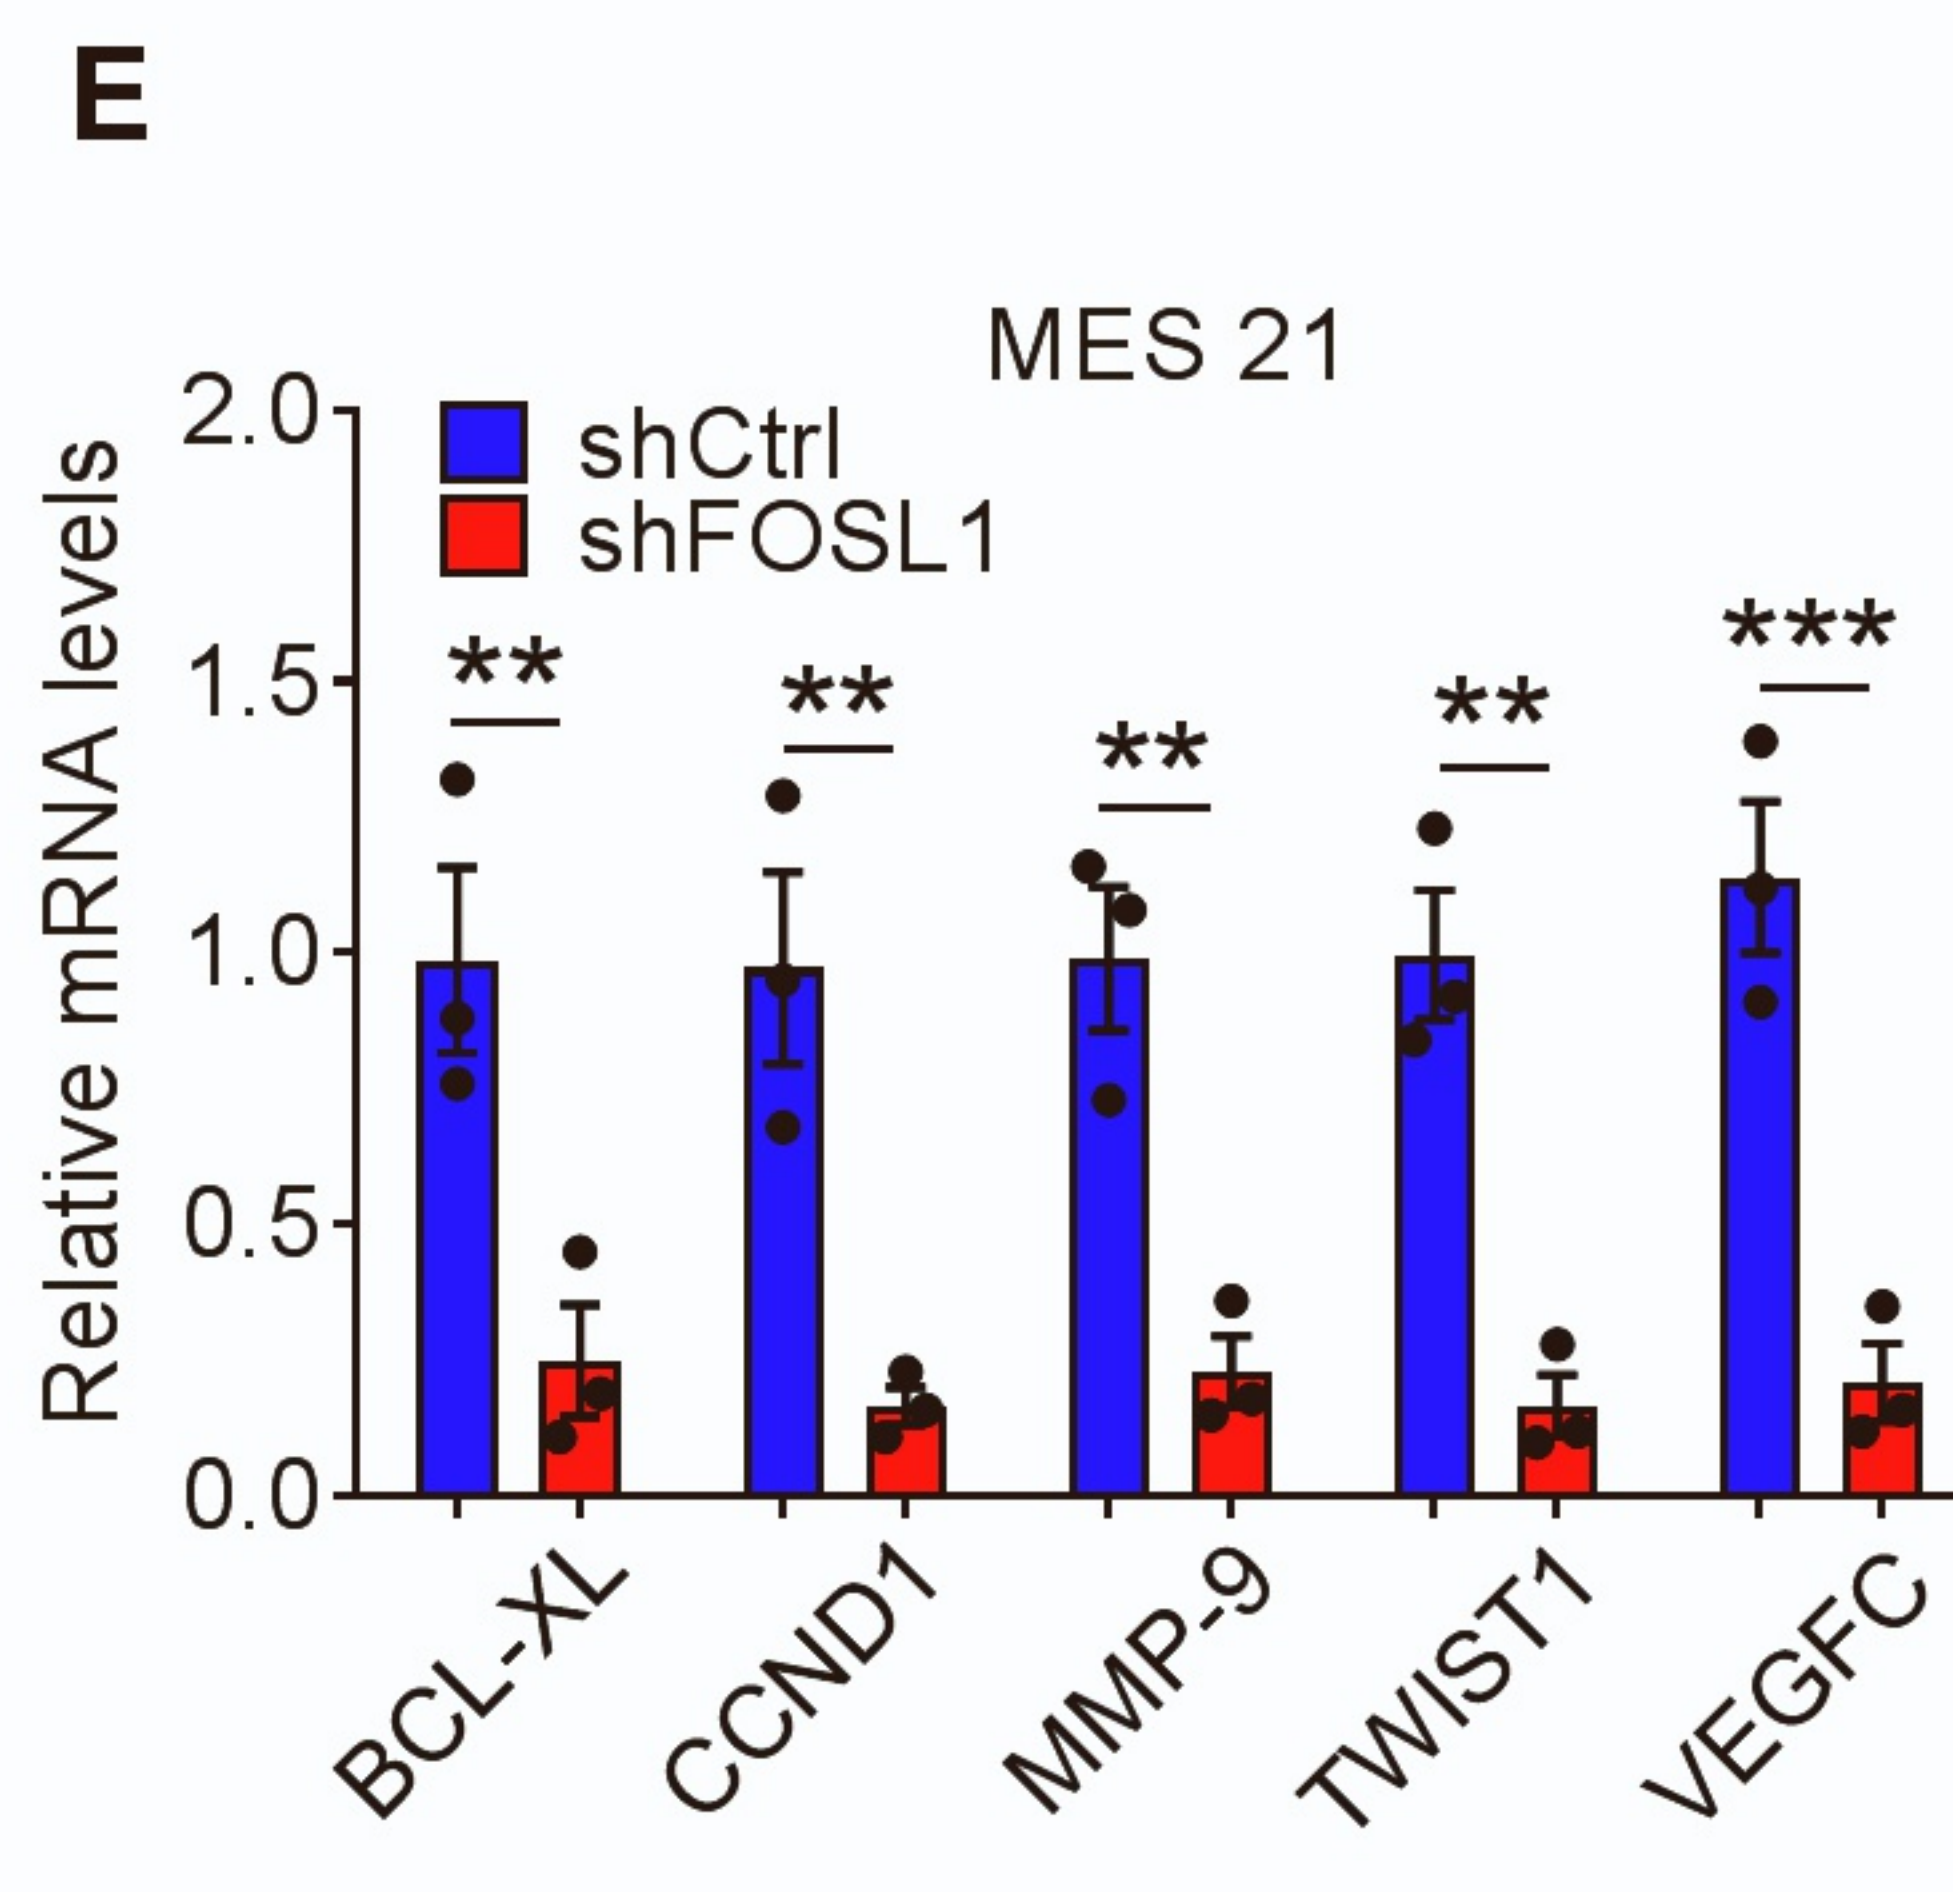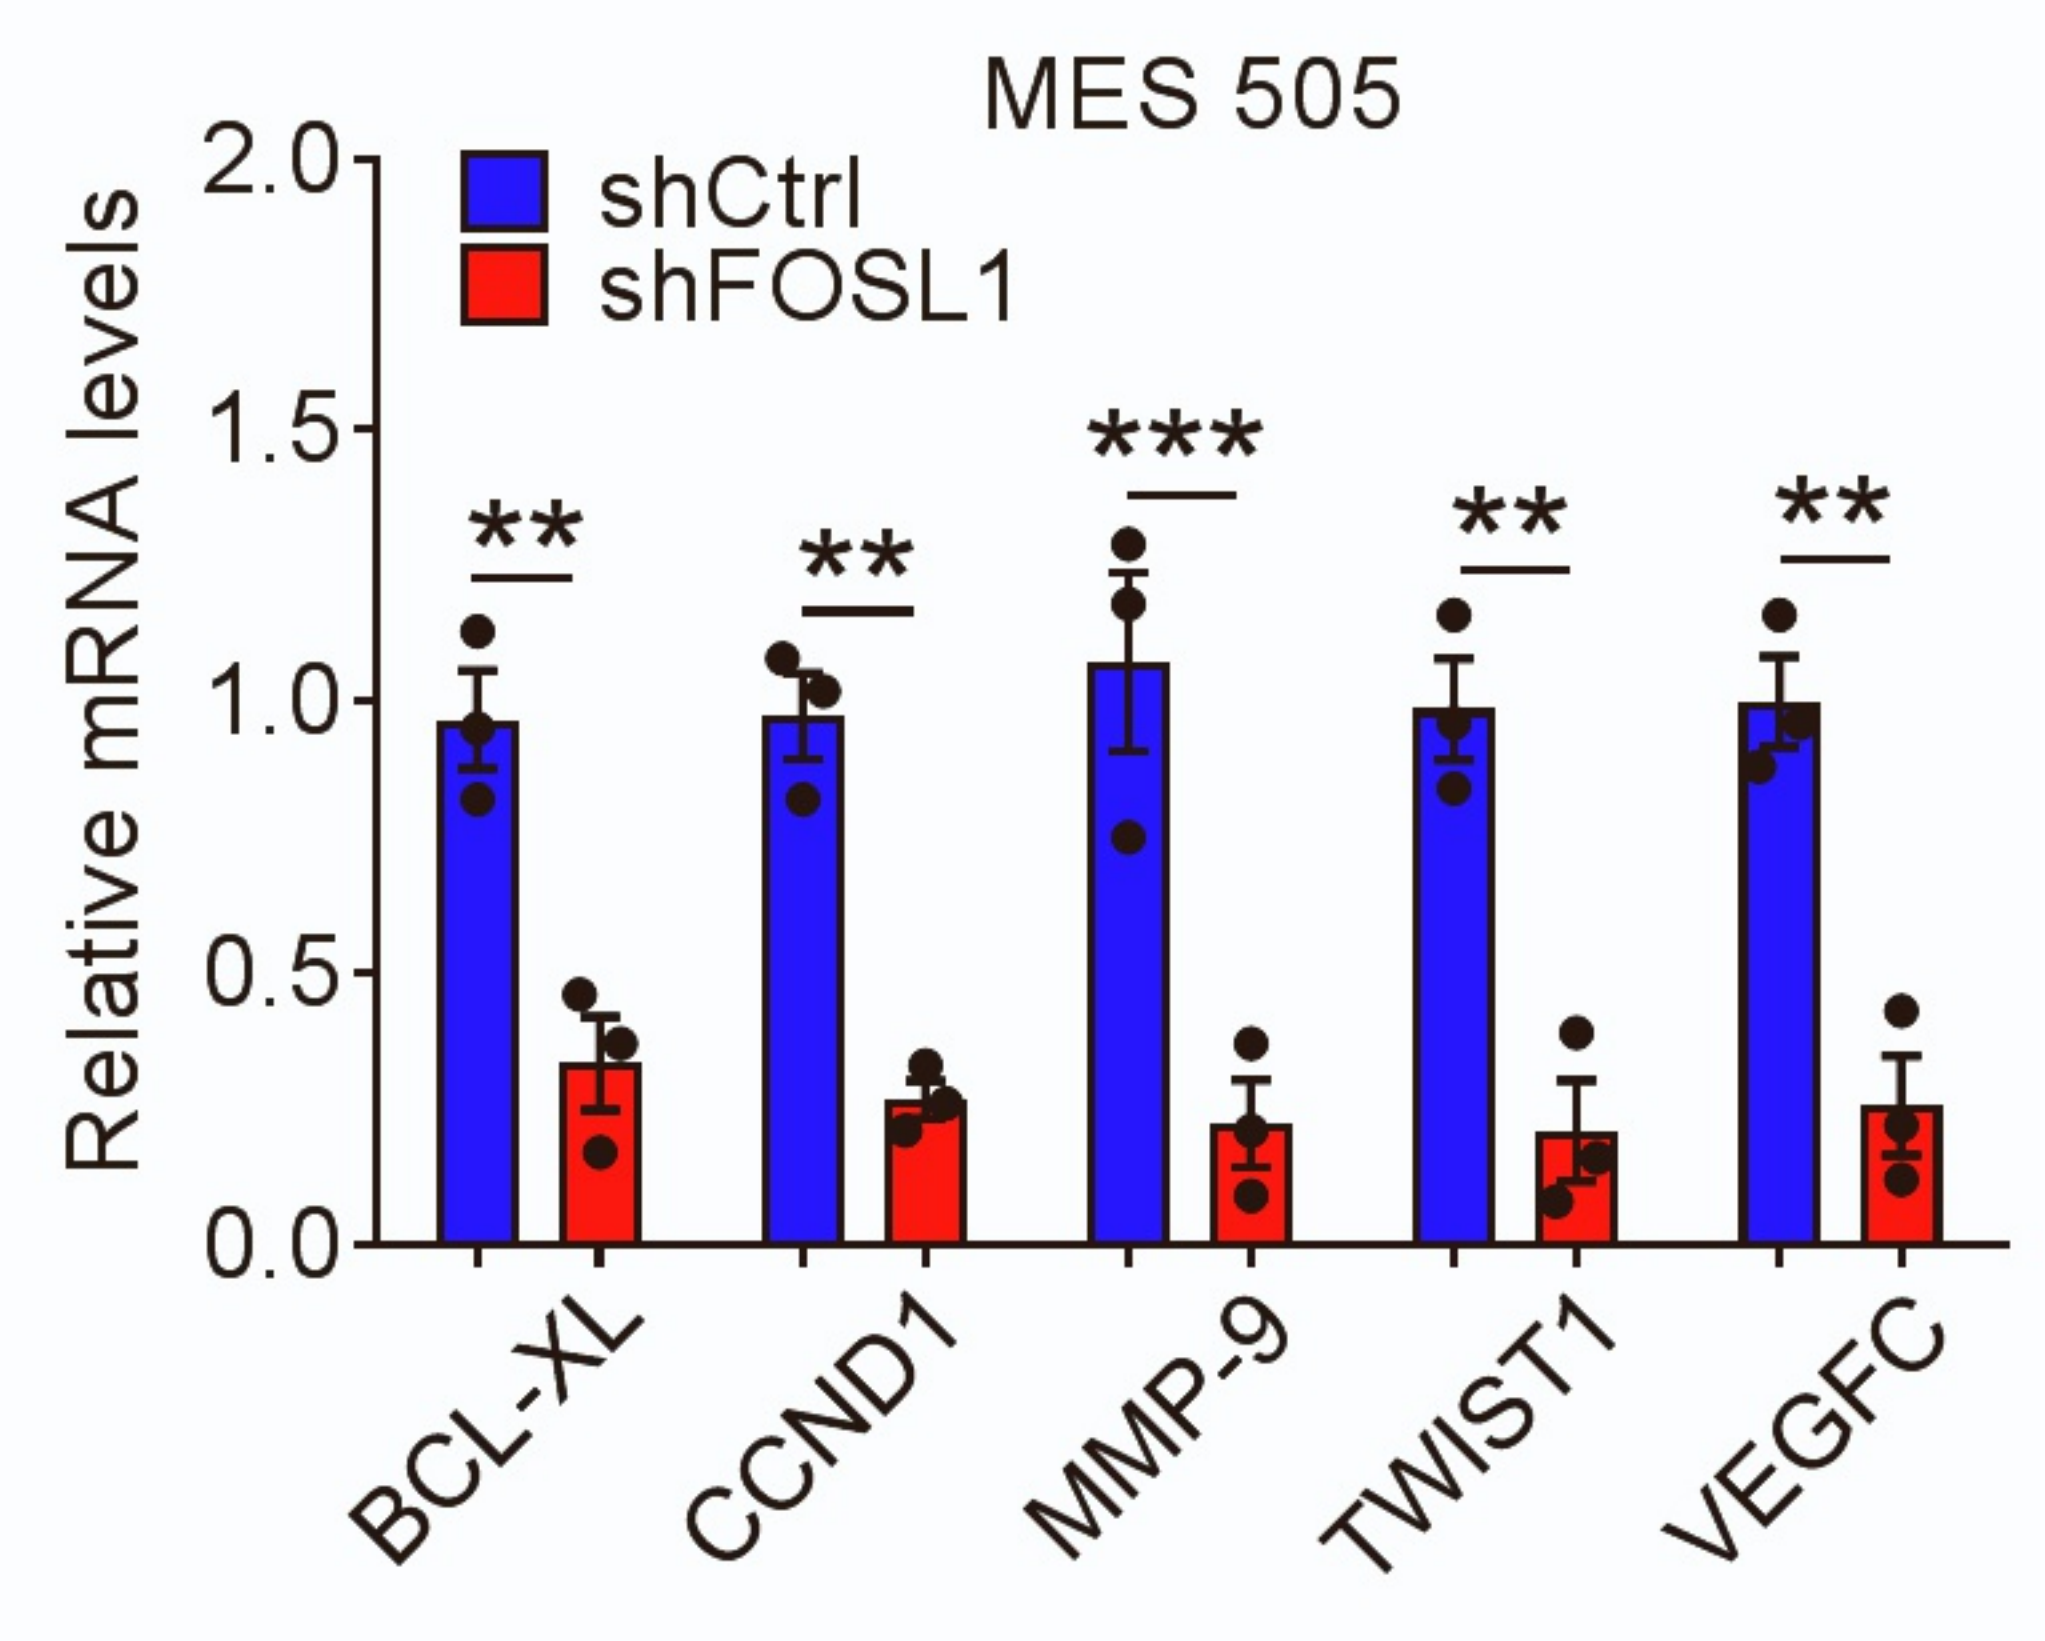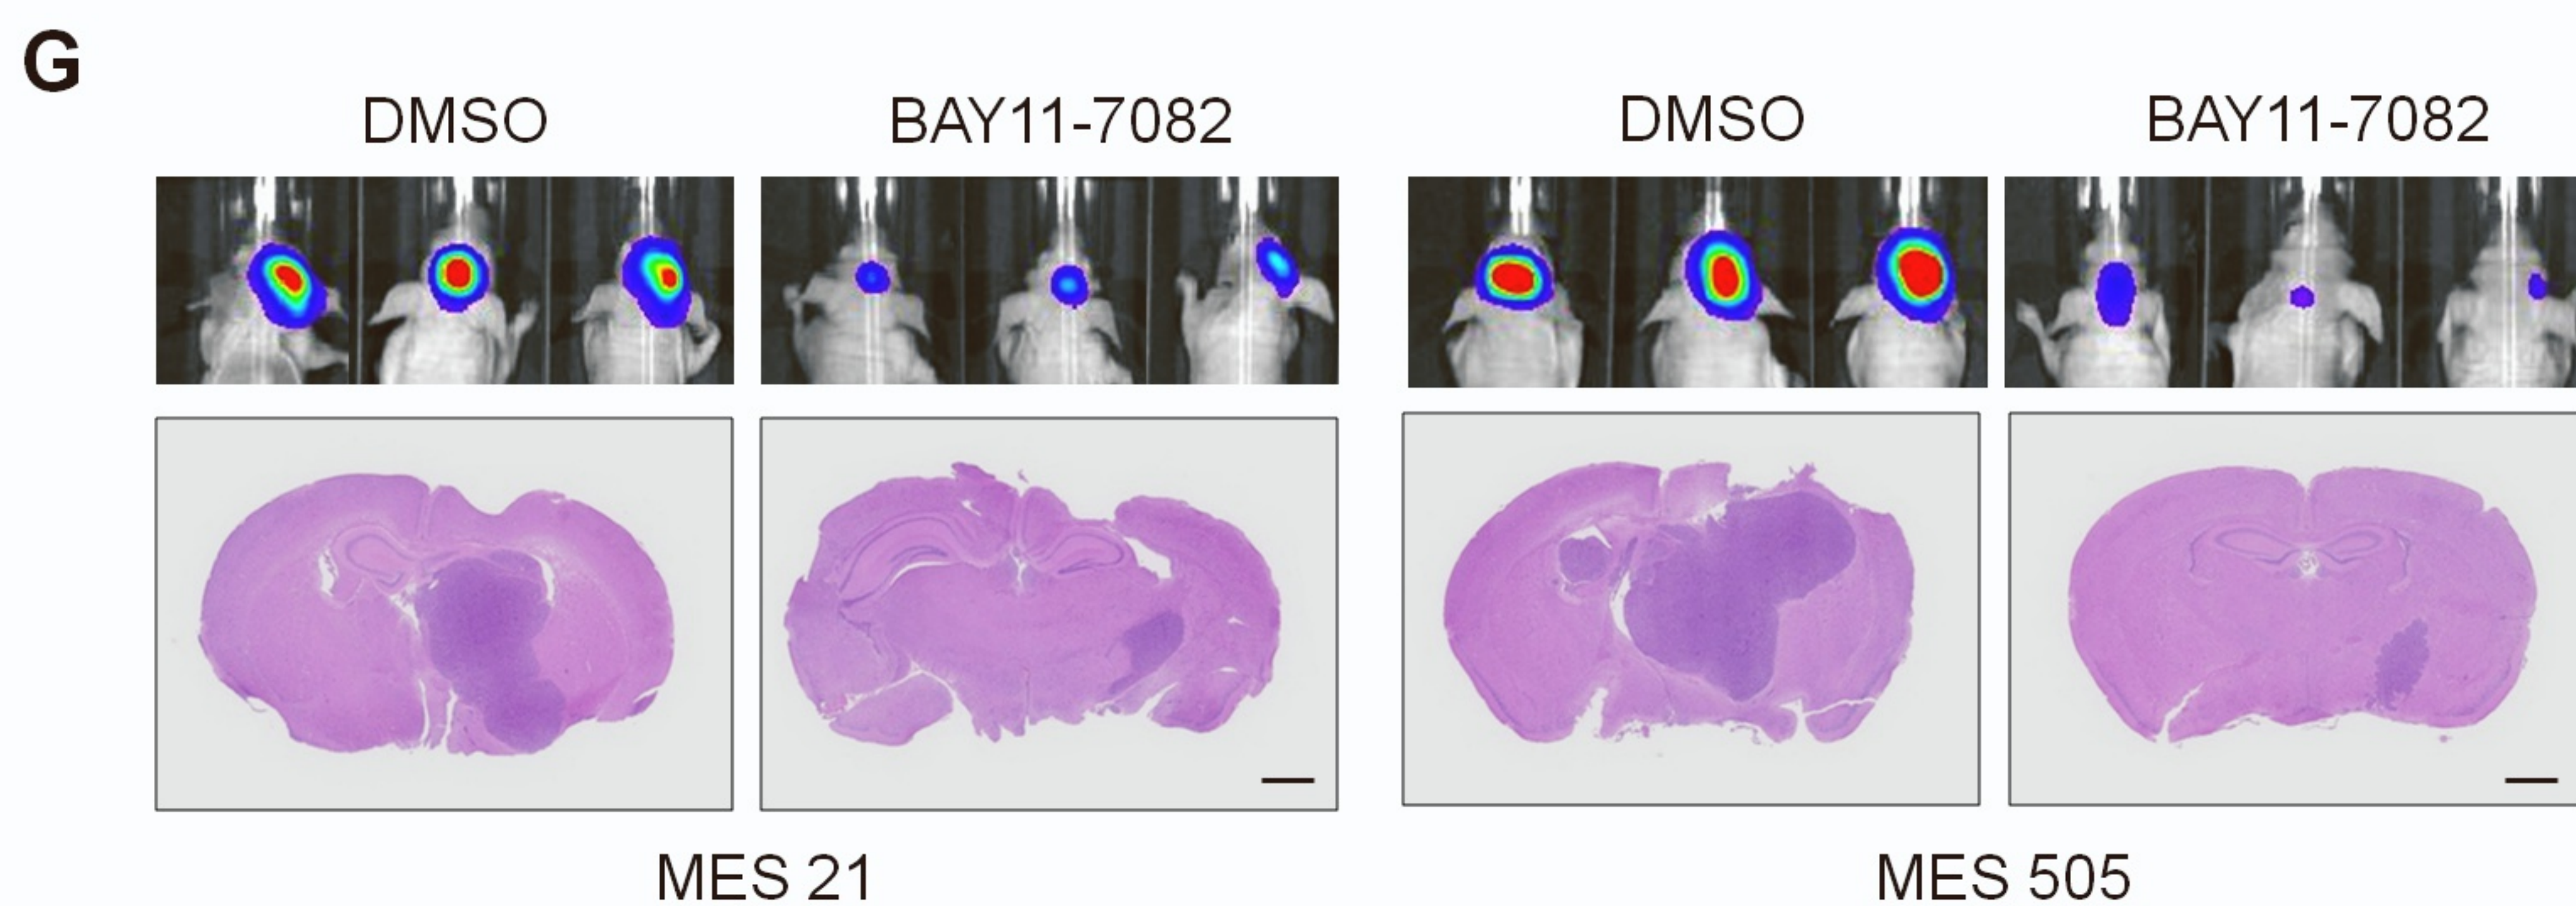

MES 21

MES 505



**Figure S3. FOSL1 induces activation of NF- $\kappa$ B signaling**

(A) GSEA analysis showing correlation between expression of FOSL1 and the enrichment of NF- $\kappa$ B targets in primary human GBM specimens (GSE103227 and GSE104267). (B) Relative luciferase reporter activity of NF- $\kappa$ B in PN 35 and PN 182 GSCs transduced with vector control or FOSL1. (C) Relative luciferase reporter activity of NF- $\kappa$ B in MES 21 and MES 182 GSCs transduced with Ctrl shRNA or FOSL1 shRNA. (D) qRT-PCR analysis of NF- $\kappa$ B target genes (*BCL-XL*, *CCND1*, *MMP-9*, *TWIST1* and *VEGFC*) in PN 35 (A) and PN 182 (B) GSCs transduced with vector control or FOSL1. (E) qRT-PCR analysis of NF- $\kappa$ B target genes (*BCL-XL*, *CCND1*, *MMP-9*, *TWIST1* and *VEGFC*) in MES 21 (C) and MES 182 (D) GSCs transduced with shCtrl or shFOSL1. (F) IF staining for p65 in PN 182 GSCs expressing exogenous FOSL1 or vector control, with or without a specific NF- $\kappa$ B inhibitor BAY 11-7082 treatment. p65 was labeled in red. Nuclei were counterstained with DAPI (blue). Scale bar, 20  $\mu$ m. (G) Representative BLI images of mice bearing xenografts derived from MES 21 and 505 GSCs, with or without BAY 11-7082 treatment (upper). Representative H&E stained brain sections in indicated MES GSCs-derived xenografts treated with DMSO or BAY 11-7082. Scale bar, 1mm (lower). Data are represented as means  $\pm$ SD of 3 independent experiments. \*\* $P < 0.01$ , \*\*\* $P < 0.001$ , 2-tailed Student's t test.







**Figure S4. FOSL1 promotes CYLD SUMOylation to impair deubiquitination of NF- $\kappa$ B signaling intermediaries**

(A and B) qRT-PCR (A) and IB (B) analysis of UBC9 mRNA and protein levels in PN 35 and PN 182 GSCs transduced with vector control or FOSL1.  $**p < 0.01$ . (C and D) qRT-PCR (C) and IB (D) analysis of UBC9 mRNA and protein levels in MES 21 and MES 505 GSCs transduced with control shRNA or FOSL1 shRNA. (E) Schematic representation of the human UBC9 regulatory region showing the positions of the five putative AP1-binding sites and the corresponding mutant binding sites. (F) WT or mutated UBC9 promoter constructs were cotransfected with pCMV-FOSL1 into HEK293T cells, and the dual luciferase activity was measured. (G) ChIP assays on AP1-binding site 1, 2 or 3 of UBC9 promoter were performed in Flag-FOSL1-transduced PN 35 and PN 182 GSCs. (H) qRT-PCR analysis of NF- $\kappa$ B target genes (*BCL-XL*, *CCND1*, *MMP-9*, *TWIST1* and *VEGFC*) in PN 35 and PN 182 GSCs expressing exogenous FOSL1 or vector control, with or without UBC9 depletion. (I) Limiting dilution neurosphere-forming assay in PN 35 and PN 182 GSCs with indicated modifications. (J and K) Representative images of BLI (J) and H&E-stained brains (K) of mice intracranially implanted with luciferase-labeled PN 35 and PN 182 GSCs with indicated modifications. Colored scale bars represent photons/s/cm<sup>2</sup>/steradian. Red arrows indicate tumors. Scale bar, 1 mm. (L) Kaplan-Meier survival curves of mice bearing PN 35 and PN 182 GSCs orthotopic xenografts with indicated modifications. Data are represented as means  $\pm$ SD of 3 independent experiments.  $**P < 0.01$ ,  $***P < 0.001$ , 2-tailed Student's t test.



## Supplemental Figure 5

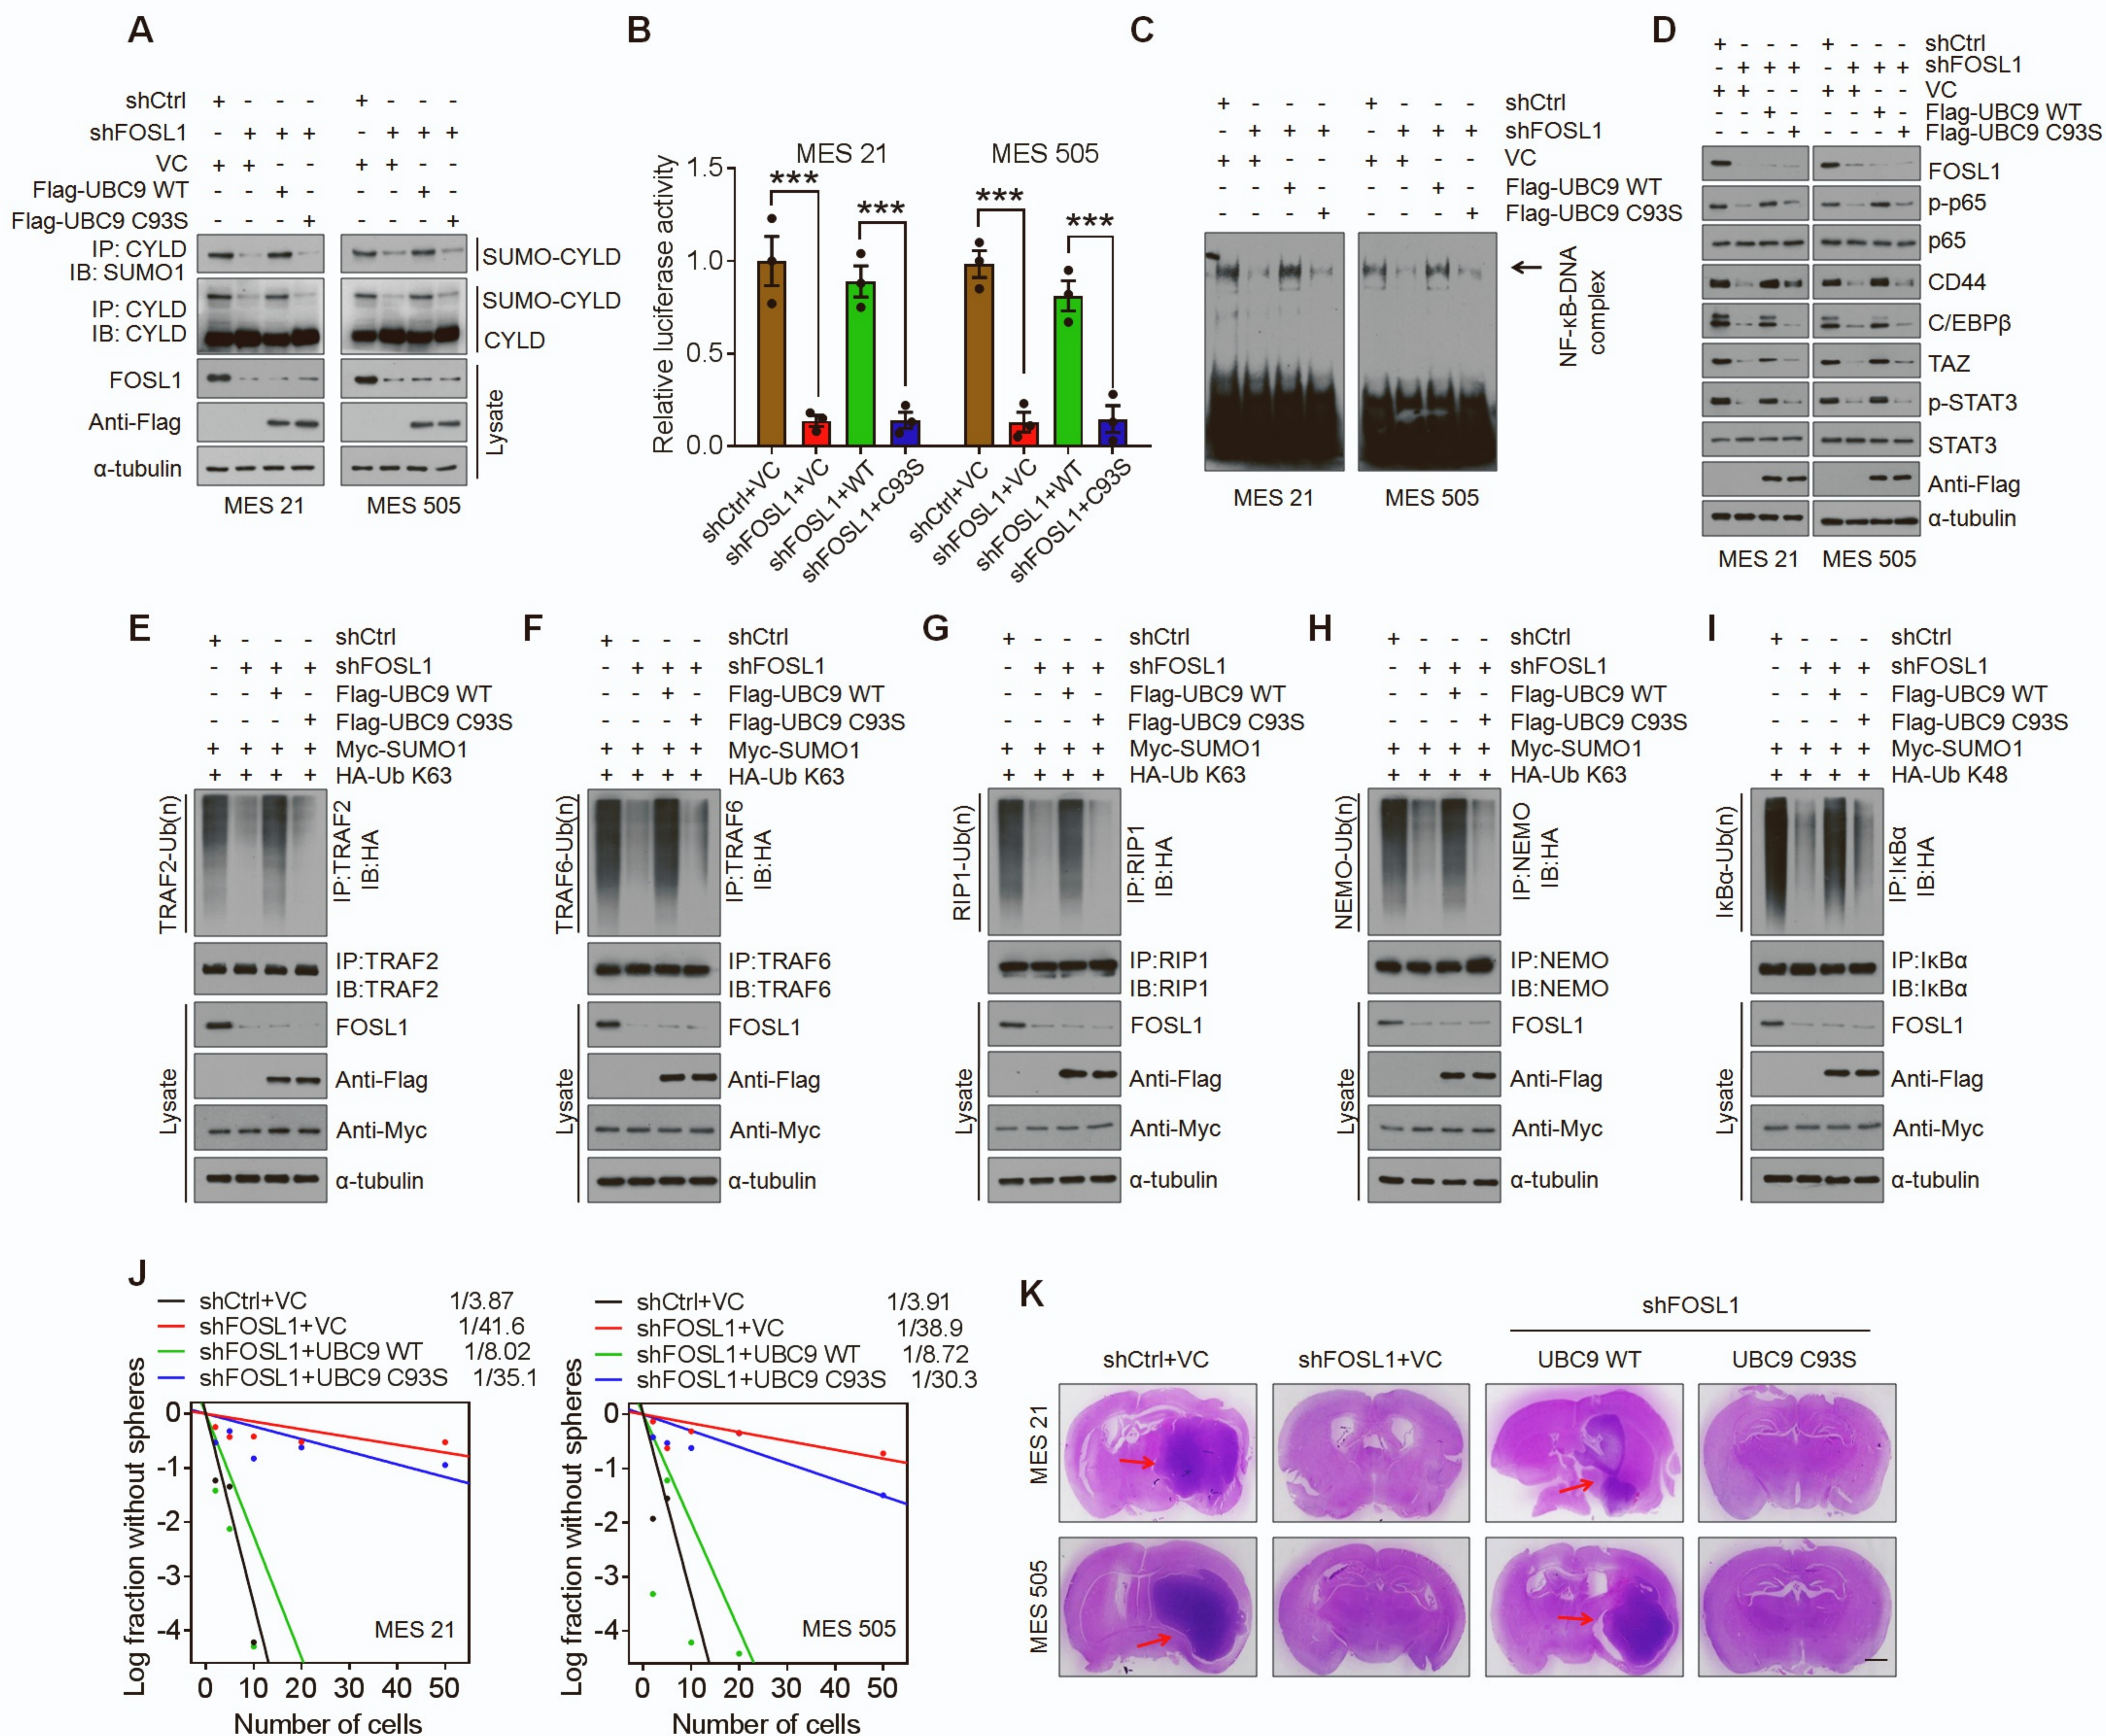



**Figure S5. FOSL1 facilitates CYLD SUMOylation, NF- $\kappa$ B activation and PMT via transcriptionally activating UBC9**

(A) MES 21 and MES 505 GSCs were transduced with shCtrl or shFOSL1, reconstituted with WT or C93S UBC9. CYLD was immunoprecipitated and then incubated with anti-SUMO1 antibody or anti-CYLD antibody, respectively. (B) Luciferase-reported NF- $\kappa$ B activity in MES 21 and MES 505 GSCs with indicated modifications. (C) EMSA analysis of NF- $\kappa$ B DNA binding activity in MES 21 and MES 505 GSCs with indicated modifications. (D) IB analysis of FOSL1, p-p65 (Ser536), p65, CD44, C/EBP $\beta$ , TAZ, p-STAT3 (Tyr705) and STAT3 in MES 21 and MES 505 GSCs with indicated modifications. (E-H) K63-linked polyubiquitin chains of TRAF2 (E), TRAF6 (F), RIP1 (G) and NEMO (H) were detected in MES 21 GSCs with indicated modifications. (I) K48-linked polyubiquitin chains of I $\kappa$ B $\alpha$  was analyzed in MES 21 GSCs with indicated modifications. (J) Limiting dilution neurosphere-forming assay in MES 21 and MES 505 GSCs with indicated modifications. (K) Representative H&E stained brain sections of mice that received indicated MES 21 and MES 505 GSCs. Red arrows indicate tumors. Scale bar, 1 mm. Data are represented as means  $\pm$ SD of 3 independent experiments. \*\*\*P < 0.001, 2-tailed Student's t test.



# Supplemental Figure 6

UBC9

Patient #1

---

Pri-PN

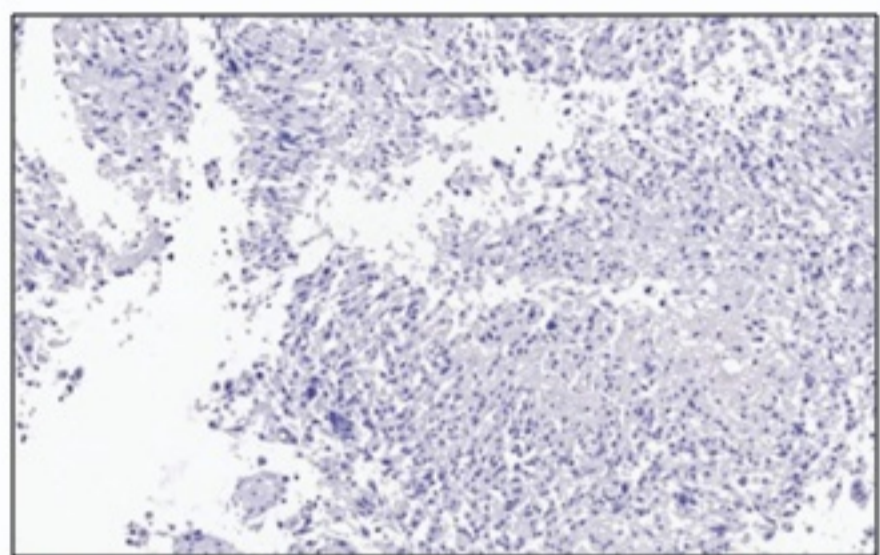

Rec-MES

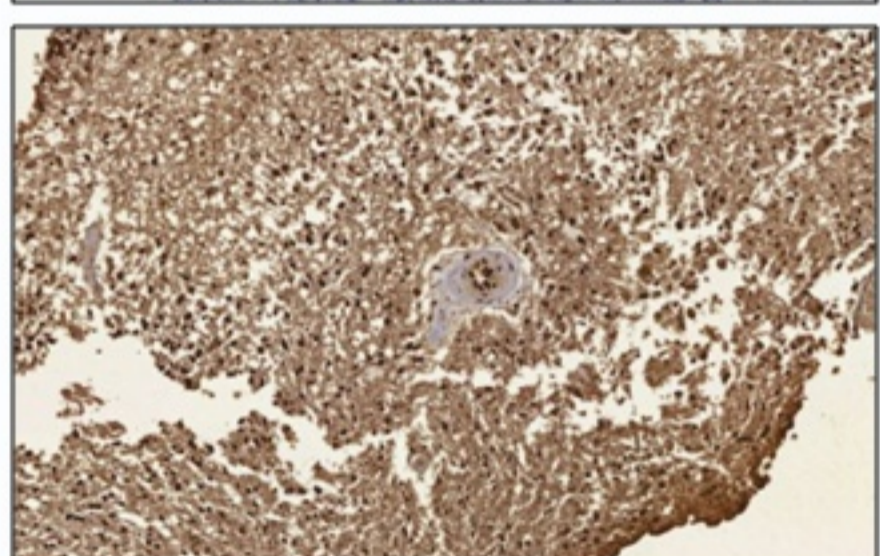

Patient #2

---

Pri-PN

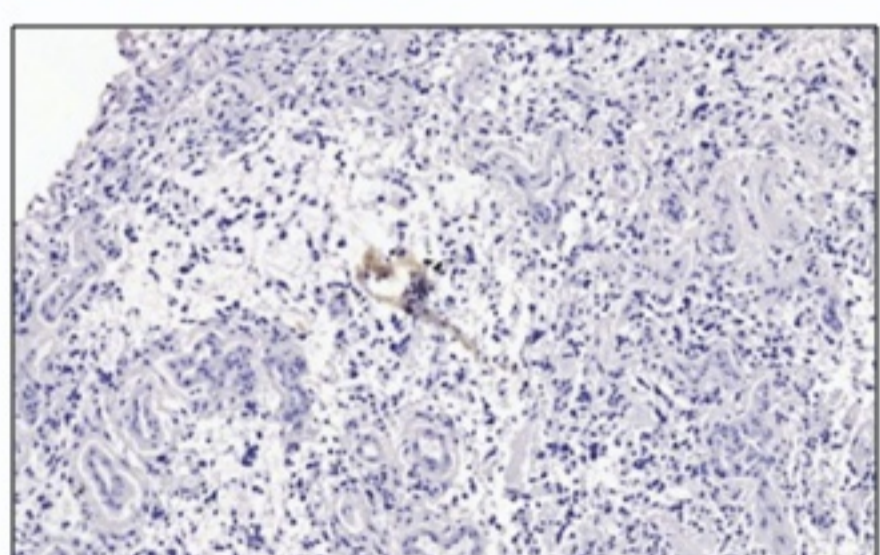

Rec-MES

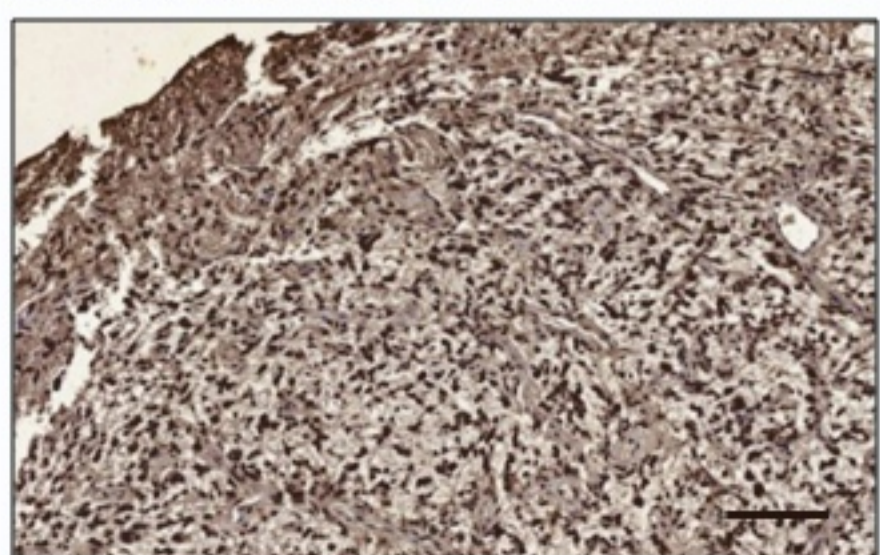



**Figure S6. Clinical relevance of FOSL1/NF- $\kappa$ B-driven PMT in human GBM**

Representative UBC9 expression levels are shown in consecutive sections of 2 matched pairs of primary PN tumors and corresponding relapsed MES tumors. Scale bars, 50  $\mu$ m.



### Patient-derived GSC Inventory

| Cell Line Name | GSC subtype | Pathological Diagnosis | Clinical Status |
|----------------|-------------|------------------------|-----------------|
| 35             | Proneural   | Glioblastoma, WHO IV   | Primary         |
| 182            | Proneural   | Glioblastoma, WHO IV   | Primary         |
| 21             | Mesenchymal | Glioblastoma, WHO IV   | Primary         |
| 505            | Mesenchymal | Glioblastoma, WHO IV   | Primary         |

**Table S1, Related to Figure 1. Patient-derived GSC Inventory**



**STR Analysis of GSC Used for This Study**

|            | Cell Line Name |        |        |        |
|------------|----------------|--------|--------|--------|
|            | 35             | 182    | 21     | 505    |
| Amelogenin | X              | X      | X      | X,Y    |
| CSF1PO     | 11, 12         | 9, 12  | 12     | 10, 12 |
| D13S317    | 10, 11         | 8, 11  | 8, 13  | 10, 13 |
| D16S539    | 9, 11          | 11, 12 | 11, 13 | 9      |
| D5S818     | 12, 13         | 12, 13 | 12     | 11, 13 |
| D7S820     | 8, 9           | 8, 11  | 9, 10  | 9, 11  |
| THO1       | 9.3            | 9      | 6, 9.3 | 6, 9.3 |
| TPOX       | 8, 11          | 9      | 9, 11  | 8, 11  |
| vWA        | 15, 16         | 16, 17 | 14, 19 | 15, 17 |

**Table S2, Related to Figure 1. STR Analysis of GSC Used for This Study**



## Characterization of the sequences of shRNAs, cDNA and ChIP-qPCR primers, and DNA probes

### Sequences for shRNAs

|                                 |                       |
|---------------------------------|-----------------------|
| TRC shRNA Control               | N/A                   |
| FOSL1 shRNA #1                  | ACTCATGGTGTTGATGCTTGG |
| FOSL1 shRNA #2                  | AATGAGGCTGTACCATCCACT |
| SMARTvector Lentiviral Controls | N/A                   |
| FOSL1 shRNA(Targer 3'-UTR)      | AATATGGTCAGTCTCATTA   |
| UBC9 shRNA #1                   | TTGGCAGTAAATCGTGTAGGC |
| UBC9 shRNA #2                   | AAATGGGTGGTCTTTCCTCCA |

### Sequences for cDNA primers

|          |                            |
|----------|----------------------------|
| UBC9-F   | ACAGTGTGCCTGTCCATCTTAGAG   |
| UBC9-R   | TGTTTTGGCAGTAAATCGTGTAGG   |
| BCL-XL-F | TCCTTGTCTACGCTTTCACG       |
| BCL-XL-R | GGTCGCATTGTGGCCTTT         |
| CCND1-F  | CCTCTGTGCCACAGATG          |
| CCND1-R  | GGGTCACACTTGATCACTC        |
| MMP9-F   | ACGACGTCTTCCAGTACCGA       |
| MMP9-R   | TTGGTCCACCTGGTTCAACT       |
| TWIST1-F | TCCGCGTCCCCTAGCA           |
| TWIST1-R | TTCTCTGGAAACAATGACATCTAGGT |
| VEGFC-F  | GTGTCCAGTGATAGATGAACTC     |
| VEGFC-R  | ATCTGTAGACGGACACACATG      |
| GAPDH-F  | GAAGGTGAAGGTCGGAGTC        |
| GAPDH-R  | GAAGATGGTGATGGGATTTC       |

### Sequences for ChIP-qPCR primers

|             |                    |
|-------------|--------------------|
| UBC9-ChIP-F | GGCGGGAATGAATGAATG |
| UBC9-ChIP-R | TTCCCTCCCCTACTCCGT |

### Sequences for NF- $\kappa$ B Biotin end-labeled DNA probes

|                             |                       |
|-----------------------------|-----------------------|
| NF- $\kappa$ B DNA probes-F | AGTTGAGGGGACTTTCAGGC  |
| NF- $\kappa$ B DNA probes-R | GCCTGGGAAAGTCCCCTCAAC |

**Table S3, Related to the Methods. Characterization of the sequences of shRNAs, cDNA and ChIP-qPCR primers, and DNA probes.**



**KEY RESOURCES TABLE**

| REAGENT or RESOURCE                                               | SOURCE                    | IDENTIFIER   |                  |
|-------------------------------------------------------------------|---------------------------|--------------|------------------|
| Antibodies                                                        |                           |              |                  |
| Anti-FOSL1 (For WB/IP)                                            | Cell Signaling Technology | Cat#5281S    | RRID:AB_10557418 |
| Anti-FOSL1 (For IF/IHC)                                           | Santa Cruz Biotechnology  | Cat#sc-28310 | RRID:AB_627632   |
| Anti-CD44                                                         | Cell Signaling Technology | Cat#3570S    | RRID:AB_10693293 |
| Anti-CD44 (For FACS)                                              | Abcam                     | Cat#ab51037  | RRID:AB_868936   |
| Anti-CD133                                                        | Abcam                     | Cat#ab19898  | RRID:AB_470302   |
| Anti-SOX2                                                         | Abcam                     | Cat#ab79351  | RRID:AB_10710406 |
| Anti-OLIG2                                                        | Abcam                     | Cat#ab81093  | RRID:AB_1640746  |
| Anti-IKK $\alpha$                                                 | Abcam                     | Cat#ab32041  | RRID:AB_733070   |
| Anti-IKK $\beta$                                                  | Abcam                     | Cat#ab124957 | RRID:AB_10975710 |
| Anti-phospho-IKK $\alpha/\beta$ (Ser180/181)                      | Abcam                     | Cat#ab55341  | RRID:AB_883038   |
| Anti-SUMO1                                                        | Abcam                     | Cat#ab32058  | RRID:AB_778173   |
| Anti-SUMO2/3                                                      | Abcam                     | Cat#ab81371  | RRID:AB_1658424  |
| Anti-SUMO4                                                        | Abcam                     | Cat#ab126606 | RRID:AB_11128131 |
| Anti-Mouse IgG                                                    | Cell Signaling Technology | Cat#5415S    | RRID:AB_10829607 |
| Anti-Rabbit IgG                                                   | Cell Signaling Technology | Cat#3900S    | RRID:AB_1550038  |
| Anti-TRAF2                                                        | Abcam                     | Cat#ab126758 | RRID:AB_11145260 |
| Anti-TRAF6                                                        | Cell Signaling Technology | Cat#8028S    | RRID:AB_10858223 |
| Anti-RIP                                                          | Abcam                     | Cat#ab72139  | RRID:AB_2178115  |
| Anti-NEMO                                                         | Abcam                     | Cat#ab178872 |                  |
| Anti-I $\kappa$ B $\alpha$                                        | Abcam                     | Cat#ab32518  | RRID:AB_733068   |
| Anti-TAZ                                                          | Abcam                     | Cat#ab84927  | RRID:AB_1925489  |
| Anti-C/EBP $\beta$                                                | Abcam                     | Cat#ab32358  | RRID:AB_726796   |
| Anti-STAT3                                                        | Cell Signaling Technology | Cat#9139S    | RRID:AB_331757   |
| Anti-phospho-STAT3 (Tyr 705)                                      | Cell Signaling Technology | Cat#9145S    | RRID:AB_2491009  |
| Anti-p65                                                          | Abcam                     | Cat#ab16502  | RRID:AB_443394   |
| Anti-phospho-p65 (Ser536)                                         | Abcam                     | Cat#ab86299  | RRID:AB_1925243  |
| Anti-phospho-histone H2AX (Ser139)                                | Abcam                     | Cat#ab26350  | RRID:AB_470861   |
| Anti- $\alpha$ -tubulin                                           | Abcam                     | Cat#ab7291   | RRID:AB_2241126  |
| Anti-UBC9                                                         | Abcam                     | Cat#ab75854  | RRID:AB_1310787  |
| Anti-Ubiquitin                                                    | Cell Signaling Technology | Cat#3933S    | RRID:AB_2180538  |
| Anti-CYLD                                                         | Cell Signaling Technology | Cat#4495S    | RRID:AB_10557111 |
| Anti-Myc-Tag                                                      | Cell Signaling Technology | Cat#2276S    | RRID:AB_331783   |
| Anti-HA-Tag                                                       | Cell Signaling Technology | Cat#3724S    | RRID:AB_1549585  |
| Anti-Flag-Tag                                                     | Sigma-Aldrich             | Cat#F3165    | RRID:AB_259529   |
| Anti-Flag-Tag (For ChIP)                                          | Cell Signaling Technology | Cat#14793S   |                  |
| Goat Anti-Rabbit IgG H&L (HRP)                                    | Abcam                     | Cat#ab6721   | RRID:AB_955447   |
| Goat Anti-Mouse IgG H&L (HRP)                                     | Abcam                     | Cat#ab6789   | RRID:AB_955439   |
| Alexa Fluor $\text{\textcircled{R}}$ 594 goat anti-rabbit IgG H+L | Thermo Fisher Scientific  | Cat#A11012   | RRID:AB_141359   |
| Alexa Fluor $\text{\textcircled{R}}$ 488 goat anti-rabbit IgG H+L | Thermo Fisher Scientific  | Cat#A11070   | RRID:AB_142134   |
| Alexa Fluor $\text{\textcircled{R}}$ 594 goat anti-mouse IgG H+L  | Thermo Fisher Scientific  | Cat#A11005   | RRID:AB_141372   |
| Alexa Fluor $\text{\textcircled{R}}$ 488 goat anti-mouse IgG H+L  | Thermo Fisher Scientific  | Cat#A11017   | RRID:AB_143160   |



*Continued*

| Recombinant DNA                        |                    |                         |
|----------------------------------------|--------------------|-------------------------|
| TRC shRNA Control                      | Dharmacon          | Cat#RHS4080             |
| FOSL1 shRNA #1                         | Dharmacon          | Cat#TRCN0000019540      |
| FOSL1 shRNA #2                         | Dharmacon          | Cat#TRCN0000019542      |
| SMARTvector Lentiviral Controls        | Dharmacon          | Cat#VSC11649            |
| FOSL1 shRNA (Target 3'UTR)             | Dharmacon          | Cat#V3SH11240-225891219 |
| UBC9 shRNA #1                          | Dharmacon          | Cat#TRCN0000007205      |
| UBC9 shRNA #2                          | Dharmacon          | Cat#TRCN0000007206      |
| CYLD shRNA #1                          | Dharmacon          | Cat#TRCN0000039629      |
| CYLD shRNA #2                          | Dharmacon          | Cat#TRCN0000039630      |
| pLenti6.2/V5-DEST Vector               | Invitrogen         | Cat#V36820              |
| pLenti6.2-FOSL1                        | This study         | N/A                     |
| pLenti6.2-UBC9 WT                      | This study         | N/A                     |
| pLenti6.2-UBC9 C93S                    | This study         | N/A                     |
| pCDH-CMV-MCS-EF1-puro                  | System Biosciences | Cat#CD510B-1            |
| pCDH-Flag-FOSL1                        | This study         | N/A                     |
| pCDH-HA-FOSL1                          | This study         | N/A                     |
| pCDH-HA-UBC9                           | This study         | N/A                     |
| pCDH-HA-CYLD                           | This study         | N/A                     |
| pCDH-Flag-CYLD WT                      | This study         | N/A                     |
| pCDH-Flag-CYLD K40R                    | This study         | N/A                     |
| pCDH-Flag-UBC9 WT                      | This study         | N/A                     |
| pCDH-Flag-UBC9 C93S                    | This study         | N/A                     |
| pRK5-HA-Ubiquitin-K63                  | Addgene            | Cat#17606               |
| pRK5-HA-Ubiquitin-K48                  | Addgene            | Cat#17605               |
| pcDNA3.1                               | Invitrogen         | Cat#V79020              |
| pcDNA3.1-Myc-SUMO1                     | This study         | N/A                     |
| pcDNA3.1-Myc-SUMO2                     | This study         | N/A                     |
| pcDNA3.1-Myc-SUMO3                     | This study         | N/A                     |
| pcDNA3.1-Myc-SUMO4                     | This study         | N/A                     |
| pLenti-CMV-Puro-LUC                    | Addgene            | Cat#17477               |
| pGL4.32[luc2P/NF- $\kappa$ B-RE/Hygro] | Promega            | Cat#E8491               |
| pGL4.75[hRluc/CMV]                     | Promega            | Cat#E6931               |

## Experimental Models: Organisms/Strains

|                   |                                                    |     |
|-------------------|----------------------------------------------------|-----|
| Athymic nude mice | Animal Core Facility of Nanjing Medical University | N/A |
|-------------------|----------------------------------------------------|-----|

## Experimental Models: Cell Lines

|                         |            |                                |
|-------------------------|------------|--------------------------------|
| HEK293T                 | ATCC       | Cat# CRL-3216; RRID: CVCL_0063 |
| Normal human astrocytes | ScienCell  | Catalog #1800                  |
| PN 35                   | This study | N/A                            |
| PN 182                  | This study | N/A                            |
| MES 21                  | This study | N/A                            |
| MES 505                 | This study | N/A                            |

*(Continued on next page)*



*Continued*

## Biological Samples

|                       |                                                                                                           |                |
|-----------------------|-----------------------------------------------------------------------------------------------------------|----------------|
| GBM patient specimen  | Department of Neurosurgery,<br>the First Affiliated Hospital of Nanjing Medical<br>University             | Nanjing, China |
| GBM Tissue Microarray | Department of Neurosurgery,<br>the Second and fourth Affiliated Hospitals of<br>Harbin Medical University | Harbin, China  |

## Chemicals, Peptides, and Recombinant Proteins

|                                                          |                                     |                |
|----------------------------------------------------------|-------------------------------------|----------------|
| DMEM/HIGH GLUCOSE                                        | HyClone                             | Cat#SH30243.01 |
| LM-DME/F12                                               | HyClone                             | Cat#SH30023.01 |
| Astrocyte Medium                                         | ScienCell Research Laboratories     | Catalog #1801  |
| Fetal Bovine Serum                                       | Gibco/Thermo Fisher Scientific      | Cat#10100147   |
| Penicillin-Streptomycin                                  | Gibco/Thermo Fisher Scientific      | Cat#15140122   |
| B27 Supplement (50X)                                     | Gibco/Life technologies             | Cat#1889394    |
| N-2 Supplement (100X)                                    | Gibco/Life technologies             | Cat#1890761    |
| EGF human                                                | Sigma-Aldrich                       | Cat#074M4114V  |
| FGF-basic human, recombinant                             | Sigma-Aldrich                       | Cat#0413AFC08  |
| LIF human                                                | Sigma-Aldrich                       | Cat#086M4128V  |
| Lipofectamine 3000                                       | Invitrogen/Thermo Fisher Scientific | Cat#L3000-015  |
| X-tremeGENE HP DNA Transfection<br>Reagent               | Roche                               | Cat#6366236001 |
| Opti-MEM I Reduced Serum Medium                          | Gibco/Thermo Fisher Scientific      | Cat#31985070   |
| Pierce Protein A/G Agarose                               | Thermo Fisher Scientific            | Cat#20421      |
| Protease and Phosphatase Inhibitor Cocktail              | Sigma-Aldrich                       | Cat#PPC1010    |
| TNF- $\alpha$                                            | Sigma-Aldrich                       | Cat#SLBS9022   |
| BAY11-7082                                               | Selleck                             | Cat#S2913      |
| PVDF Western Blotting Membranes                          | Roche Diagnostics                   | Cat#28745500   |
| SuperSignal™ West Femto Maximum<br>Sensitivity Substrate | Thermo Fisher Scientific            | Cat#34096      |
| N-Ethylmaleimide                                         | Sigma-Aldrich                       | Cat#E3876      |
| VECTASHIELD Antifade Mounting<br>Medium with DAPI        | Vector Laboratories                 | Cat#H-1200     |

## Critical Commercial Assays

|                                                        |                                      |              |
|--------------------------------------------------------|--------------------------------------|--------------|
| ViraPower™ II Lentiviral Gateway™<br>Expression System | Invitrogen                           | Cat#K36720   |
| Papain Dissociation System                             | Worthington Biochemical              | Cat#LK003176 |
| Misfolded Protein Ubiquitination Kit                   | Ubiquitin-Proteasome Biotechnologies | Cat#J5110    |
| RNeasy Mini Kit                                        | Qiagen                               | Cat#74106    |
| iScript cDNA Synthesis Kit                             | Bio-Rad                              | Cat#1708891  |
| iTaq™ Universal SYBR® Green Supermix                   | Bio-Rad                              | Cat#172-5124 |
| Ion 550™ Chip Kit                                      | Thermo Fisher Scientific             | Cat#A34538   |
| CellTiter-Glo® Luminescent Cell Viability<br>Assay     | Promega                              | Cat#G7571    |
| QuikChange Site-Directed Mutagenesis Kit               | Agilent Technologies                 | Cat#200519   |
| LightShift Chemiluminescent EMSA Kit                   | Thermo Fisher Scientific             | Cat#20148    |

*Continued*

| REAGENT or RESOURCE                                                     | SOURCE                                                                                                                          | IDENTIFIER         |
|-------------------------------------------------------------------------|---------------------------------------------------------------------------------------------------------------------------------|--------------------|
| Click-iT™ EdU Alexa Fluor™ 488 Imaging Kit                              | Invitrogen                                                                                                                      | Cat#C10337         |
| MycoAlert™ Mycoplasma Detection Kit                                     | Lonza                                                                                                                           | Cat#LT07-418       |
| DAB Substrate Kit                                                       | Abcam                                                                                                                           | Cat# ab64238       |
| Dual Luciferase Reporter Assay Kit                                      | Promega                                                                                                                         | Cat#E1910          |
| Sequence-Based Reagents                                                 |                                                                                                                                 |                    |
| All primers and oligonucleotides are listed in <a href="#">Table S3</a> | This study                                                                                                                      | N/A                |
| Software and Algorithms                                                 |                                                                                                                                 |                    |
| Software TriTek Comet Score Freeware v1.5                               | <a href="http://www.autocomet.com">http://www.autocomet.com</a>                                                                 | TriTek Corporation |
| Extreme Limiting Dilution Analysis                                      | <a href="http://bioinf.wehi.edu.au/software/elda/">http://bioinf.wehi.edu.au/software/elda/</a>                                 | ELDA               |
| TCGA RNA Sequence Analysis                                              | <a href="https://tcga-data.nci.nih.gov/docs/publications/gbm_exp/">https://tcga-data.nci.nih.gov/docs/publications/gbm_exp/</a> | N/A                |
| AP-1 Binding Site Prediction                                            | <a href="http://jaspar.genereg.net/">http://jaspar.genereg.net/</a>                                                             | JASPAR             |
| GraphPad Prism                                                          | <a href="https://www.graphpad.com/scientificsoftware/prism/">https://www.graphpad.com/scientificsoftware/prism/</a>             | GraphPad Software  |
| FlowJo                                                                  | <a href="https://www.flowjo.com/solutions/flowjo">https://www.flowjo.com/solutions/flowjo</a>                                   | FLOWJO, LLC        |
| ImageJ                                                                  | <a href="https://imagej.nih.gov/ij/download.html">https://imagej.nih.gov/ij/download.html</a>                                   | ImageJ             |
| Pannoramic Viewer                                                       | <a href="http://www.3dhistech.com/pannoramic_viewer">http://www.3dhistech.com/pannoramic_viewer</a>                             | 3DHISTECH Ltd.     |
